# Supplementary material for: Stereoselective synthesis of syn and anti 1,2-hydroxyalkyl moieties by Cu-catalyzed asymmetric allylic alkylation
Source: Royal Society of Chemistry journal article supplement (doi:10.1039/c0cc05161f), 2011-01-01

## **ELECTRONIC SUPPLEMENTARY INFORMATION**

### **Stereoselective synthesis of *syn* and *anti* 1,2-hydroxyalkyl moieties by Cu-catalyzed asymmetric allylic alkylation**

Martín Fañanás-Mastral, Bjorn ter Horst, Adriaan J. Minnaard and Ben L. Feringa\*

*Stratingh Institute for Chemistry, University of Groningen, Nijenborgh 4, 9747 AG, Groningen,  
The Netherlands.*

## Table of Contents:

|                                                                                                                                    |            |
|------------------------------------------------------------------------------------------------------------------------------------|------------|
| <b>General Procedures</b>                                                                                                          | <b>S3</b>  |
| <b>General procedure for the stereoselective Cu-catalyzed synthesis of 1,2-hydroxyalkyl compounds 5</b>                            | <b>S3</b>  |
| <b>Characterization of <i>anti</i> and <i>syn</i> compounds 5</b>                                                                  | <b>S4</b>  |
| <b>General procedure for the synthesis of compounds 7 and <math>\alpha,\beta</math>-unsaturated <math>\delta</math>-lactones 8</b> | <b>S8</b>  |
| <b>Characterization of compounds 7 and 8</b>                                                                                       | <b>S9</b>  |
| <b>NMR spectra</b>                                                                                                                 | <b>S12</b> |
| <b>Proposed mechanism for the copper-catalyzed AAA of allyl bromide 4 with Grignard reagents</b>                                   | <b>S25</b> |
| <b>GC traces for the temperature-depending experiments for the AAA of allyl bromide 4 with MeMgBr catalyzed by Cu-TaniaPhos</b>    | <b>S26</b> |

## General Procedures:

Chromatography: Merck silica gel type 9385 230-400 mesh, TLC: Merck silica gel 60, 0.25 mm. Components were visualized by UV and cerium/molybdenum staining. Progress and conversion of the reaction were determined by GC-MS (GC, HP6890; MS HP5973) with an HP1 or HP5 column (Agilent Technologies, Palo Alto, CA). Mass spectra were recorded on a AEI-MS-902 mass spectrometer (EI+) or a LTQ Orbitrap XL (ESI+).  $^1\text{H}$ - and  $^{13}\text{C}$ -NMR were recorded on a Varian AMX400 (400 and 100.59 MHz, respectively) or a Varian VXR300 (300 and 75 MHz, respectively) using  $\text{CDCl}_3$  as solvent. Chemical shift values are reported in ppm with the solvent resonance as the internal standard ( $\text{CHCl}_3$ :  $\delta$  7.26 for  $^1\text{H}$ ,  $\delta$  77.0 for  $^{13}\text{C}$ ). Data are reported as follows: chemical shifts, multiplicity (s = singlet, d = doublet, t = triplet, q = quartet, br = broad, m = multiplet), coupling constants (Hz), and integration. Carbon assignments are based on APT  $^{13}\text{C}$ -NMR experiments. Optical rotations were measured on a *Schmidt + Haensch* polarimeter (Polartronic MH8) with a 10 cm cell (*c* given in g/100 mL).

All reactions were carried out under a nitrogen atmosphere using oven dried glassware and using standard Schlenk techniques.  $\text{CH}_2\text{Cl}_2$  was dried and distilled over calcium hydride. Substrate **4** was prepared according to literature procedures.<sup>1</sup>  $\text{CuBr}\cdot\text{SMe}_2$ , Grubbs 2<sup>nd</sup> generation and Hoveyda-Grubbs 2<sup>nd</sup> generation catalysts, ligands **L1-4** and commercially available reagents were purchased from Aldrich, and used without further purification. Grignard reagents were purchased from Aldrich (MeMgBr, EtMgBr, *n*-HexMgBr, *c*- $\text{C}_5\text{H}_9\text{MgBr}$ ) or prepared from the corresponding alkyl bromides and magnesium turnings in  $\text{Et}_2\text{O}$  following standard procedures ( $\text{PhCH}_2\text{CH}_2\text{MgBr}$ ). Grignard reagents were titrated using *s*-BuOH and catalytic amounts of 1,10-phenanthroline.

## General procedure for the stereoselective Cu-catalyzed synthesis of 1,2-hydroxyalkyl compounds **5**

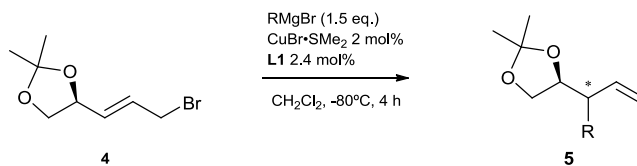

In a Schlenk tube equipped with septum and stirring bar,  $\text{CuBr}\cdot\text{SMe}_2$  (10  $\mu\text{mol}$ , 2.06 mg) and ligand **L1** (12  $\mu\text{mol}$ , 8.24 mg) were dissolved in  $\text{CH}_2\text{Cl}_2$  (2 mL) and stirred under nitrogen at room temperature for 15 min. The mixture was cooled to  $-80^\circ\text{C}$  and the

<sup>1</sup> (a) J. A. Marshall, J. D. Trometer, D. G. Cleary, *Tetrahedron*, 1989, **45**, 391; (b) A. R. Ellwood, A. J. P. Mortimer, D. A. Tocher, M. J. Porter, *Synlett*, 2008, 2199.

corresponding Grignard reagent (solution in Et<sub>2</sub>O, 0.75 mmol) was added dropwise. Allyl bromide **4** (0.5 mmol, 110 mg) was then added dropwise as a solution in CH<sub>2</sub>Cl<sub>2</sub> (0.8 mL) at that temperature over 1 h *via* a syringe pump. Once the addition was complete the resulting mixture was further stirred at -80 °C for 4 h. The reaction was quenched by addition of MeOH (0.5 mL) and the mixture was allowed to reach rt. Then, saturated aqueous NH<sub>4</sub>Cl solution (2 mL) was added to the mixture. The organic phase was separated, and the resulting aqueous layer was extracted with Et<sub>2</sub>O (3 x 5 mL). The combined organic layers were dried with anhydrous Na<sub>2</sub>SO<sub>4</sub>, filtered and concentrated *in vacuo*. The crude product was purified by flash chromatography on silica gel using a mixture of pentane:Et<sub>2</sub>O as eluent to yield the corresponding 1,2-hydroxyalkyl compound **5**.

**Note:** GC analysis was carried out on a sample obtained after aqueous extraction with Et<sub>2</sub>O, which has been passed through a short plug of silica gel to remove transition metal residues.

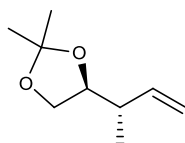

**(-)-(*S*)-4-((*S*)-but-3-en-2-yl)-2,2-dimethyl-1,3-dioxolane (*anti*-**5a**):** Purification by column chromatography (SiO<sub>2</sub>, pentane/Et<sub>2</sub>O 30:1) afforded *anti*-**5a** (71 mg, 91%) as a colourless oil.  $[\alpha]_D^{20} = -2.8$  (c = 0.5 in CHCl<sub>3</sub>) [lit.<sup>2</sup>  $[\alpha]_D^{20} = -2.5$  (c = 1.21 in CHCl<sub>3</sub>)]. <sup>1</sup>H NMR (400 MHz, CDCl<sub>3</sub>) δ 5.87 – 5.78 (m, 1H), 5.09 – 5.04 (m, 2H), 4.00 – 3.94 (m, 2H), 3.65 – 3.60 (m, 1H), 2.33 (sext., *J* = 6.5 Hz, 1H), 1.40 (s, 3H), 1.35 (s, 3H), 1.00 (dd, *J* = 6.8, 1.0, 3H). <sup>13</sup>C NMR (101 MHz, CDCl<sub>3</sub>) δ 140.2, 115.2, 109.2, 79.5, 67.6, 41.0, 26.8, 25.7, 15.7. HRMS (APCI+, *m/z*): calculated for C<sub>9</sub>H<sub>17</sub>O<sub>2</sub> [M+H<sup>+</sup>]: 157.1223, found: 157.1219.

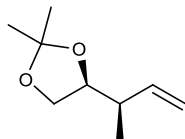

<sup>2</sup> R. W. Hoffmann, W. Helbig, *Chem. Ber.* 1981, **114**, 2802.

**(+)-(S)-4-((R)-but-3-en-2-yl)-2,2-dimethyl-1,3-dioxolane (syn-5a):** Purification by column chromatography (SiO<sub>2</sub>, pentane/Et<sub>2</sub>O 30:1) afforded **syn-5a** (66 mg, 85%) as a colourless oil.  $[\alpha]_D^{20} = + 7.6$  (c = 0.65 in CHCl<sub>3</sub>). <sup>1</sup>H NMR (400 MHz, CDCl<sub>3</sub>) δ 5.74 – 5.65 (m, 1H), 5.08 (d, *J* = 17.4 Hz, 1H), 5.04 (d, *J* = 10.3 Hz, 1H), 3.97 – 3.87 (m, 2H), 3.64 (t, *J* = 7.3 Hz, 1H), 2.32 (sext., *J* = 6.8 Hz, 1H), 1.41 (s, 3H), 1.35 (s, 3H), 1.09 (d, *J* = 6.7, 4H). <sup>13</sup>C NMR (101 MHz, CDCl<sub>3</sub>) δ 139.7, 115.6, 109.2, 79.6, 67.9, 41.9, 26.9, 25.7, 16.6. HRMS (APCI+, *m/z*): calculated for C<sub>9</sub>H<sub>17</sub>O<sub>2</sub> [M+H<sup>+</sup>]: 157.1223, found: 157.1220.

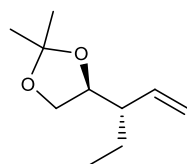

**(+)-(S)-2,2-dimethyl-4-((S)-pent-1-en-3-yl)-1,3-dioxolane (anti-5b):** Purification by column chromatography (SiO<sub>2</sub>, pentane/Et<sub>2</sub>O 30:1) afforded **anti-5b** (76 mg, 89%) as a colourless oil.  $[\alpha]_D^{20} = + 6.0$  (c = 1.0 in CHCl<sub>3</sub>). <sup>1</sup>H NMR (400 MHz, CDCl<sub>3</sub>) δ 5.67 – 5.58 (m, 1H), 5.13 (dd, *J* = 10.3, 0.6 Hz, 1H), 5.05 (dd, *J* = 17.2, 0.6 Hz, 1H), 4.06 – 3.96 (m, 2H), 3.63 (t, *J* = 7.4 Hz, 1H), 2.04 – 1.97 (m, 1H), 1.47 – 1.40 (m, 1H), 1.38 (s, 3H), 1.33 (s, 3H), 1.32 – 1.20 (m, 1H), 0.87 (t, *J* = 7.4 Hz, 3H). <sup>13</sup>C NMR (101 MHz, CDCl<sub>3</sub>) δ 138.3, 117.3, 108.9, 78.5, 67.7, 49.3, 26.7, 25.7, 23.9, 11.9. HRMS (ESI+, *m/z*): calculated for C<sub>10</sub>H<sub>19</sub>O<sub>2</sub> [M+H<sup>+</sup>]: 171.1370, found: 171.1379.

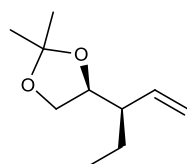

**(+)-(S)-2,2-dimethyl-4-((R)-pent-1-en-3-yl)-1,3-dioxolane (syn-5b):** Purification by column chromatography (SiO<sub>2</sub>, pentane/Et<sub>2</sub>O 30:1) afforded **syn-5b** (68 mg, 80%) as a colourless oil.  $[\alpha]_D^{20} = + 3.0$  (c = 1.0 in CHCl<sub>3</sub>). <sup>1</sup>H NMR (400 MHz, CDCl<sub>3</sub>) δ 5.54 – 5.42 (m, 1H), 5.12 – 5.00 (m, 2H), 3.95 – 3.90 (m, 2H), 3.61 (t, *J* = 10.2 Hz, 1H), 2.08 – 1.99 (m, 1H), 1.80 – 1.71 (m, 1H), 1.39 (s, 3H), 1.34 (s, 3H), 1.32 – 1.18 (m, 1H), 0.87 (t, *J* = 7.4 Hz, 3H). <sup>13</sup>C NMR (101 MHz, CDCl<sub>3</sub>) δ 138.0, 117.5, 109.2, 78.5, 68.3, 50.3,

27.0, 25.9, 24.1, 11.5. HRMS (ESI+,  $m/z$ ): calculated for  $C_{10}H_{19}O_2$  [ $M+H^+$ ]: 171.1370, found: 171.1378.

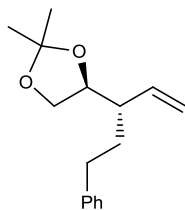

**(+)-(S)-2,2-dimethyl-4-((S)-5-phenylpent-1-en-3-yl)-1,3-dioxolane** (*anti*-5c):

Purification by column chromatography ( $SiO_2$ , pentane/ $Et_2O$  20:1) afforded *anti*-5c (103 mg, 84%) as a colourless oil.  $[\alpha]_D^{20} = +25.4$  ( $c = 1.0$  in  $CHCl_3$ ).  $^1H$  NMR (400 MHz,  $CDCl_3$ )  $\delta$  7.31 – 7.27 (m, 2H), 7.21 – 7.17 (m, 3H), 5.78 – 5.69 (m, 1H), 5.25 (d,  $J = 10.2$  Hz, 1H), 5.13 (d,  $J = 17.2$  Hz, 1H), 4.08 (dd,  $J = 12.5, 6.4$  Hz, 1H), 4.01 – 3.97 (m, 1H), 3.64 (t,  $J = 7.6$  Hz, 1H), 2.77 – 2.70 (m, 1H), 2.57 – 2.49 (m, 1H), 2.22 – 2.15 (m, 1H), 1.79 – 1.64 (m, 2H), 1.41 (s, 3H), 1.36 (s, 3H).  $^{13}C$  NMR (101 MHz,  $CDCl_3$ )  $\delta$  142.4, 138.1, 128.7, 128.6, 126.0, 118.0, 109.1, 78.7, 67.6, 47.0, 33.6, 32.9, 26.7, 25.7. HRMS (APCI+,  $m/z$ ): calculated for  $C_{16}H_{23}O_2$  [ $M+H^+$ ]: 247.1693, found: 247.1690.

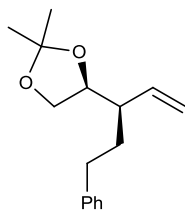

**(-)-(S)-2,2-dimethyl-4-((R)-5-phenylpent-1-en-3-yl)-1,3-dioxolane** (*syn*-5c):

Purification by column chromatography ( $SiO_2$ , pentane/ $Et_2O$  25:1) afforded *syn*-5c (89 mg, 72%) as a colourless oil.  $[\alpha]_D^{20} = -1.4$  ( $c = 1.0$  in  $CHCl_3$ ).  $^1H$  NMR (400 MHz,  $CDCl_3$ )  $\delta$  7.30 – 7.26 (m, 2H), 7.23 – 7.10 (m, 3H), 5.63 – 5.54 (m, 1H), 5.18 – 5.12 (m, 2H), 3.98 – 3.92 (m, 2H), 3.67 – 3.62 (m, 1H), 2.77 – 2.70 (m, 1H), 2.57 – 2.49 (m, 1H), 2.23 – 2.15 (m, 1H), 2.13 – 2.05 (m, 1H), 1.62 – 1.53 (m, 1H), 1.38 (s, 3H), 1.35 (s, 3H).  $^{13}C$  NMR (101 MHz,  $CDCl_3$ )  $\delta$  142.5, 138.1, 128.7, 128.5, 125.9, 118.0, 109.3, 78.6, 68.2, 48.2, 33.3, 32.8, 27.0, 25.9. HRMS (APCI+,  $m/z$ ): calculated for  $C_{16}H_{23}O_2$  [ $M+H^+$ ]: 247.1693, found: 247.1691.

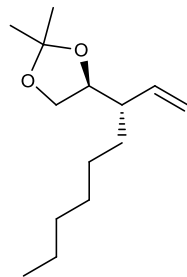

**(+)-(S)-2,2-dimethyl-4-((S)-non-1-en-3-yl)-1,3-dioxolane (*anti*-5d):** Purification by column chromatography (SiO<sub>2</sub>, pentane/Et<sub>2</sub>O 40:1) afforded *anti*-5d (99 mg, 87%) as a colourless oil.  $[\alpha]_D^{20} = + 33.8$  (c = 1.0 in CHCl<sub>3</sub>). <sup>1</sup>H NMR (400 MHz, CDCl<sub>3</sub>) δ 5.64 (dt, *J* = 17.2, 10.2 Hz, 1H), 5.12 (dd, *J* = 10.2, 1.1 Hz, 1H), 5.04 (dd, *J* = 17.2, 1.1 Hz, 1H), 4.05 – 3.97 (m, 2H), 3.63 (t, *J* = 7.2 Hz, 1H), 2.15 – 2.05 (m, 1H), 1.39 (s, 3H), 1.34 (s, 3H), 1.33 – 1.18 (m, 10H), 0.87 (t, *J* = 6.5 Hz, 3H). <sup>13</sup>C NMR (101 MHz, CDCl<sub>3</sub>) δ 138.6, 117.1, 109.0, 78.8, 67.7, 47.6, 32.0, 31.0, 29.5, 27.3, 26.7, 25.7, 22.8, 14.3. HRMS (APCI+, *m/z*): calculated for C<sub>14</sub>H<sub>27</sub>O<sub>2</sub> [M+H<sup>+</sup>]: 227.2006, found: 227.2005.

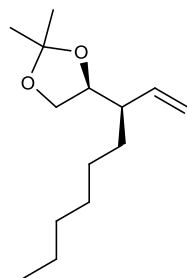

**(+)-(S)-2,2-dimethyl-4-((R)-non-1-en-3-yl)-1,3-dioxolane (*syn*-5d):** Purification by column chromatography (SiO<sub>2</sub>, pentane/Et<sub>2</sub>O 40:1) afforded *syn*-5d (88 mg, 79%) as a colourless oil.  $[\alpha]_D^{20} = + 2.0$  (c = 1.0 in CHCl<sub>3</sub>). <sup>1</sup>H NMR (400 MHz, CDCl<sub>3</sub>) δ 5.54 – 5.45 (m, 1H), 5.09 – 5.02 (m, 2H), 3.94 – 3.88 (m, 2H), 3.65 – 3.60 (m, 1H), 2.16 – 2.07 (m, 1H), 1.72 – 1.64 (m, 1H), 1.40 (s, 3H), 1.35 (s, 3H), 1.33 – 1.18 (m, 9H), 0.87 (t, *J* = 6.8, 3H). <sup>13</sup>C NMR (101 MHz, CDCl<sub>3</sub>) δ 138.4, 117.3, 109.2, 78.7, 68.2, 48.7, 32.0, 31.2, 29.5, 27.1, 25.9, 22.9, 14.3. HRMS (APCI+, *m/z*): calculated for C<sub>14</sub>H<sub>27</sub>O<sub>2</sub> [M+H<sup>+</sup>]: 227.2006, found: 227.2005.

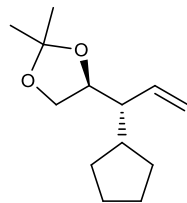

(+)-(S)-4-((R)-1-cyclopentylallyl)-2,2-dimethyl-1,3-dioxolane (*anti*-**5e**): Purification by column chromatography (SiO<sub>2</sub>, pentane/Et<sub>2</sub>O 30:1) afforded *anti*-**5e** (84 mg, 80%) as a colourless oil.  $[\alpha]_D^{20} = +13.8$  (c = 1.0 in CHCl<sub>3</sub>). <sup>1</sup>H NMR (400 MHz, CDCl<sub>3</sub>) δ 5.79 – 5.70 (m, 1H), 5.12 (d, *J* = 10.3 Hz, 1H), 5.00 (d, *J* = 17.2 Hz, 1H), 4.23 – 4.17 (m, 1H), 3.97 (t, *J* = 7.0 Hz, 1H), 3.63 (t, *J* = 7.7 Hz, 1H), 1.93 – 1.79 (m, 3H), 1.66 – 1.48 (m, 4H), 1.37 (s, 3H), 1.34 (s, 3H), 1.23 – 1.07 (m, 2H). <sup>13</sup>C NMR (101 MHz, CDCl<sub>3</sub>) δ 137.2, 117.4, 108.8, 77.4, 67.9, 52.3, 41.5, 30.9, 30.8, 26.6, 25.7, 25.2, 25.1. HRMS (ESI+, *m/z*): calculated for C<sub>13</sub>H<sub>23</sub>O<sub>2</sub> [M+H<sup>+</sup>]: 211.1693, found: 211.1690.

### General procedure for the synthesis of compounds **7** and $\alpha,\beta$ -unsaturated $\delta$ -lactones **8**.

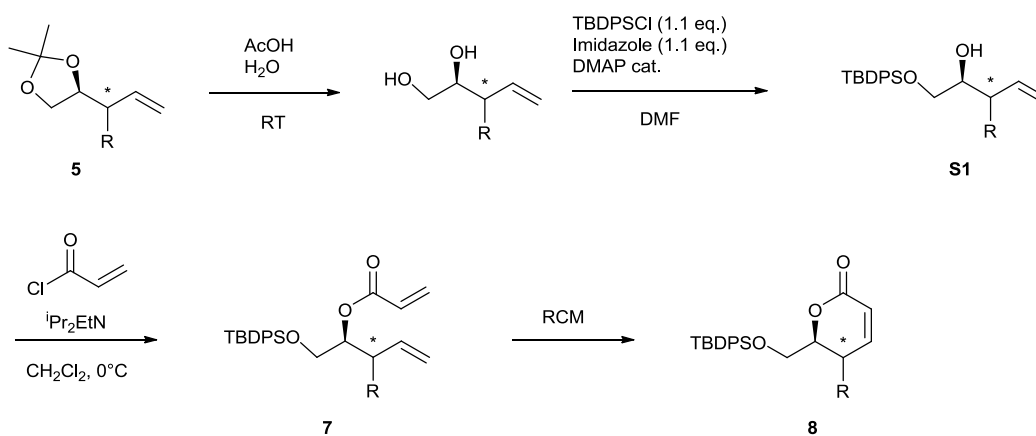

To a solution of **5** (1 mmol) in water (2 mL) at room temperature was added AcOH (5 mL). The solution was stirred at this temperature during 16 h. After some coevaporations with toluene (4 x 10 mL), the residue was dissolved in DMF (2 mL) and imidazole (75 mg, 1.1 mmol), DMAP (1 mg, 0.08 mmol) and *tert*-butyl(chloro)diphenylsilane (0.29 mL, 1.1 mmol) were added at 0 °C. The mixture was warmed to room temperature and was stirred during 16 h. Then it was poured into water (5 mL) and extracted with CH<sub>2</sub>Cl<sub>2</sub> (3 x 5 mL). The combined organic layers were washed with water and brine and dried



over Na<sub>2</sub>SO<sub>4</sub>. The resulting product **S1** was used in the next step without further purification.

To a solution of **S1** (1 mmol) and DIPEA (0.34 mL, 2 mmol) in CH<sub>2</sub>Cl<sub>2</sub> (5 mL), acryloyl chloride (0.13 mL, 1.5 mmol) was added at 0 °C. The mixture was stirred at this temperature for 2 h. Then it was quenched with saturated aqueous solution of NaHCO<sub>3</sub> (2 mL), extracted with CH<sub>2</sub>Cl<sub>2</sub> (3 x 5 mL) and dried over Na<sub>2</sub>SO<sub>4</sub>. The product was purified by flash chromatography on silica gel using a mixture of Pentane:Et<sub>2</sub>O as eluent to yield the corresponding compound **7**.

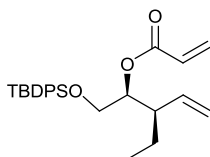

**(-)-(2S,3R)-1-((tert-butyldiphenylsilyl)oxy)-3-ethylpent-4-en-2-yl acrylate (7a):**

Purification by column chromatography (SiO<sub>2</sub>, pentane/Et<sub>2</sub>O 30:1) afforded **7a** (337 mg, 80%, over 3 steps) as a colourless oil.  $[\alpha]_D^{20} = -25.8$  (c = 1.0 in CHCl<sub>3</sub>). <sup>1</sup>H NMR (400 MHz, CDCl<sub>3</sub>) δ 7.67 – 7.64 (m, 4H), 7.45 – 7.34 (m, 6H), 6.43 (dd, *J* = 17.3, 1.5 Hz, 1H), 6.17 (dd, *J* = 17.3, 10.4 Hz, 1H), 5.85 (dd, *J* = 10.4, 1.5 Hz, 1H), 5.55 – 5.46 (m, 1H), 5.10 – 5.00 (m, 3H), 3.80 – 3.72 (m, 2H), 2.40 (ddd, *J* = 18.3, 9.4, 3.5 Hz, 1H), 1.59 – 1.49 (m, 1H), 1.28 – 1.17 (m, 1H), 1.03 (s, 9H), 0.84 (t, *J* = 7.4 Hz, 3H). <sup>13</sup>C NMR (101 MHz, CDCl<sub>3</sub>) δ 165.8, 137.6, 135.6, 135.5, 133.4, 133.4, 130.5, 129.6, 129.6, 128.8, 127.6, 117.5, 76.4, 63.6, 46.6, 26.7, 22.9, 19.2, 11.4. HRMS (ESI+, *m/z*): calculated for C<sub>26</sub>H<sub>34</sub>O<sub>3</sub>SiNa [M+Na<sup>+</sup>]: 445.2169, found: 445.2178.

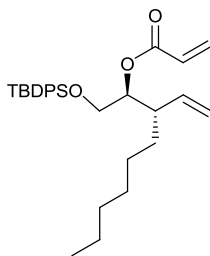

**(+)-(2S,3S)-1-((tert-butyldiphenylsilyl)oxy)-3-vinylnonan-2-yl acrylate (7b):**

Purification by column chromatography (SiO<sub>2</sub>, pentane/Et<sub>2</sub>O 40:1) afforded **7b** (85%, over 3 steps) as a colourless oil.  $[\alpha]_D^{20} = +9.0$  (c = 0.98 in CHCl<sub>3</sub>). <sup>1</sup>H NMR (400 MHz,

CDCl<sub>3</sub>) δ 7.67 – 7.64 (m, 4H), 7.45 – 7.34 (m, 6H), 6.38 (dd, *J* = 17.3, 1.5 Hz, 1H), 6.11 (dd, *J* = 17.3, 10.4 Hz, 1H), 5.81 (dd, *J* = 10.4, 1.5 Hz, 1H), 5.58 (dt, *J* = 17.1, 9.8 Hz, 1H), 5.12 (q, *J* = 5.1 Hz, 1H), 5.06 – 4.98 (m, 2H), 3.75 (dd, *J* = 10.8, 6.3 Hz, 1H), 3.68 (dd, *J* = 10.8, 4.8 Hz, 1H), 2.47 – 2.40 (m, 1H), 1.45 – 1.38 (m, 1H), 1.33 – 1.18 (m, 9H), 1.02 (s, 9H), 0.87 (t, *J* = 6.7 Hz, 3H). <sup>13</sup>C NMR (101 MHz, CDCl<sub>3</sub>) δ 165.6, 137.8, 135.6, 135.53, 133.4, 133.4, 130.4, 129.6, 129.6, 128.8, 127.6, 127.6, 117.2, 76.0, 63.5, 44.9, 31.7, 30.7, 29.1, 27.0, 26.7, 22.6, 19.2, 14.1. HRMS (ESI+, *m/z*): calculated for C<sub>30</sub>H<sub>43</sub>O<sub>3</sub>Si [M+H<sup>+</sup>]: 479.2976, found: 479.2969.

*General procedure for the RCM*

Grubbs 2<sup>nd</sup> generation catalyst (4.3 mg, 0.005 mmol) was added to a degassed solution of **7** (0.1 mmol) in CH<sub>2</sub>Cl<sub>2</sub> (10 mL), and the mixture was refluxed during 14 h. The solvent was removed and the residue was purified by flash chromatography on silica gel using a 5:1 mixture of Pentane:Et<sub>2</sub>O as eluent to yield the corresponding compound **8**.

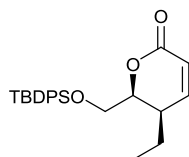

**(-)-(5R,6S)-6-(((tert-butyl-diphenylsilyl)oxy)methyl)-5-ethyl-5,6-dihydro-2H-pyran-2-one (8a)**: Purification by column chromatography (SiO<sub>2</sub>, pentane/Et<sub>2</sub>O 5:1) afforded **8a** (39 mg, 97%) as a colourless oil. [α]<sub>D</sub><sup>20</sup> = - 136.2 (c = 1.0 in CHCl<sub>3</sub>). <sup>1</sup>H NMR (400 MHz, CDCl<sub>3</sub>) δ 7.68 – 7.63 (m, 4H), 7.47 – 7.37 (m, 6H), 7.04 (dd, *J* = 9.8, 6.0 Hz, 1H), 6.03 (dd, *J* = 9.8, 0.9 Hz, 1H), 4.56 (ddd, *J* = 8.0, 5.9, 3.8 Hz, 1H), 3.92 (dd, *J* = 10.6, 5.9 Hz, 1H), 3.81 (dd, *J* = 10.6, 8.0 Hz, 1H), 2.56 – 2.50 (m, 1H), 1.69 – 1.59 (m, 1H), 1.45 (ddq, *J* = 14.7, 9.8, 7.5 Hz, 1H), 1.07 (s, 9H), 0.94 (t, *J* = 7.5 Hz, 1H). <sup>13</sup>C NMR (101 MHz, CDCl<sub>3</sub>) δ 163.8, 150.3, 135.5, 132.9, 132.8, 129.9, 127.8, 120.9, 79.5, 62.1, 36.1, 26.8, 20.5, 19.2, 11.0. HRMS (ESI+, *m/z*): calculated for C<sub>24</sub>H<sub>30</sub>O<sub>3</sub>SiNa [M+Na<sup>+</sup>]: 417.1856, found: 417.1863.

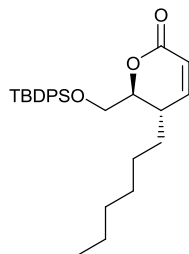

**(+)-(5S,6S)-6-(((*tert*-butyldiphenylsilyl)oxy)methyl)-5-hexyl-5,6-dihydro-2H-pyran-2-one (8b):** Purification by column chromatography (SiO<sub>2</sub>, pentane/Et<sub>2</sub>O 5:1) afforded **8b** (38 mg, 84%) as a colourless oil.  $[\alpha]_D^{20} = + 84.2$  ( $c = 0.92$  in CHCl<sub>3</sub>). <sup>1</sup>H NMR (400 MHz, CDCl<sub>3</sub>)  $\delta$  7.67 – 7.64 (m, 4H), 7.46 – 7.37 (m, 6H), 6.73 (dd,  $J = 9.9, 4.0$  Hz, 1H), 5.93 (dd,  $J = 9.9, 1.8$  Hz, 1H), 4.32 – 4.28 (m, 1H), 3.86 (dd,  $J = 11.0, 4.9$  Hz, 1H), 3.83 (dd,  $J = 11.0, 4.2$  Hz, 1H), 2.77– 2.70 (m, 1H), 1.58 – 1.50 (m, 1H), 1.46 – 1.26 (m, 9H), 1.07 (s, 9H), 0.90 (t,  $J = 6.9$  Hz, 3H). <sup>13</sup>C NMR (101 MHz, CDCl<sub>3</sub>)  $\delta$  163.3, 149.0, 135.6, 135.5, 132.9, 132.7, 129.9, 129.9, 127.8, 127.8, 119.9, 81.4, 63.4, 34.0, 31.6, 31.2, 29.2, 26.8, 26.3, 22.6, 19.2, 14.0. HRMS (ESI+,  $m/z$ ): calculated for C<sub>28</sub>H<sub>38</sub>O<sub>3</sub>SiNa [M+Na<sup>+</sup>]: 473.2482, found: 473.2459.

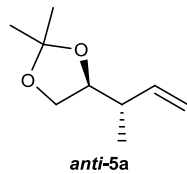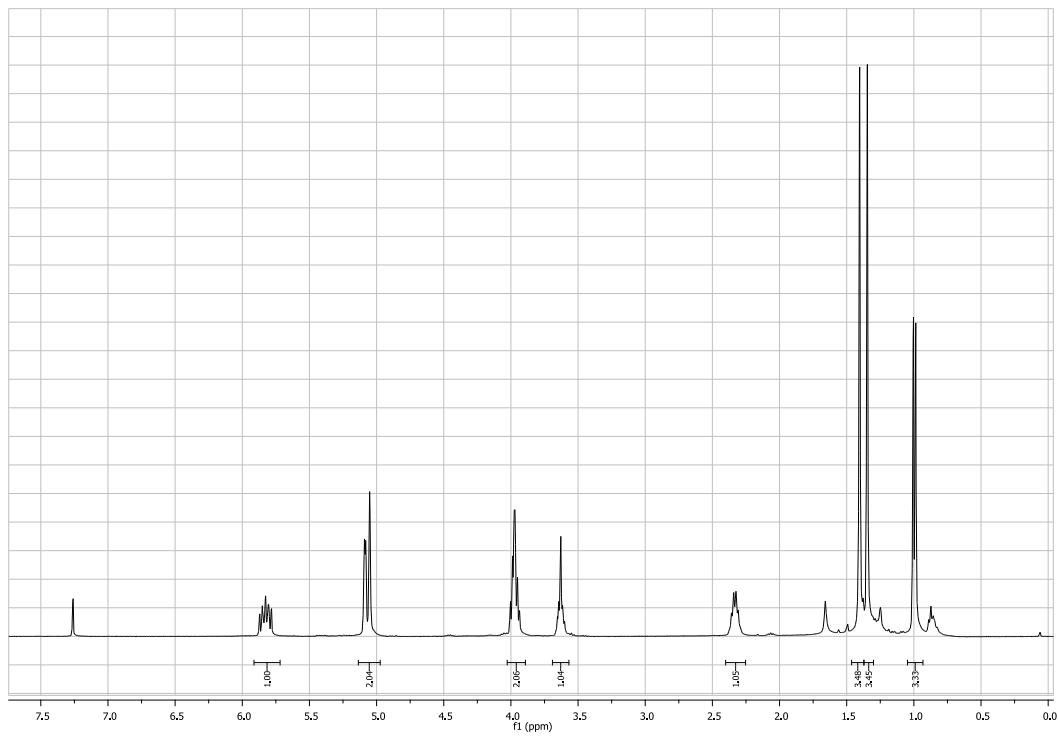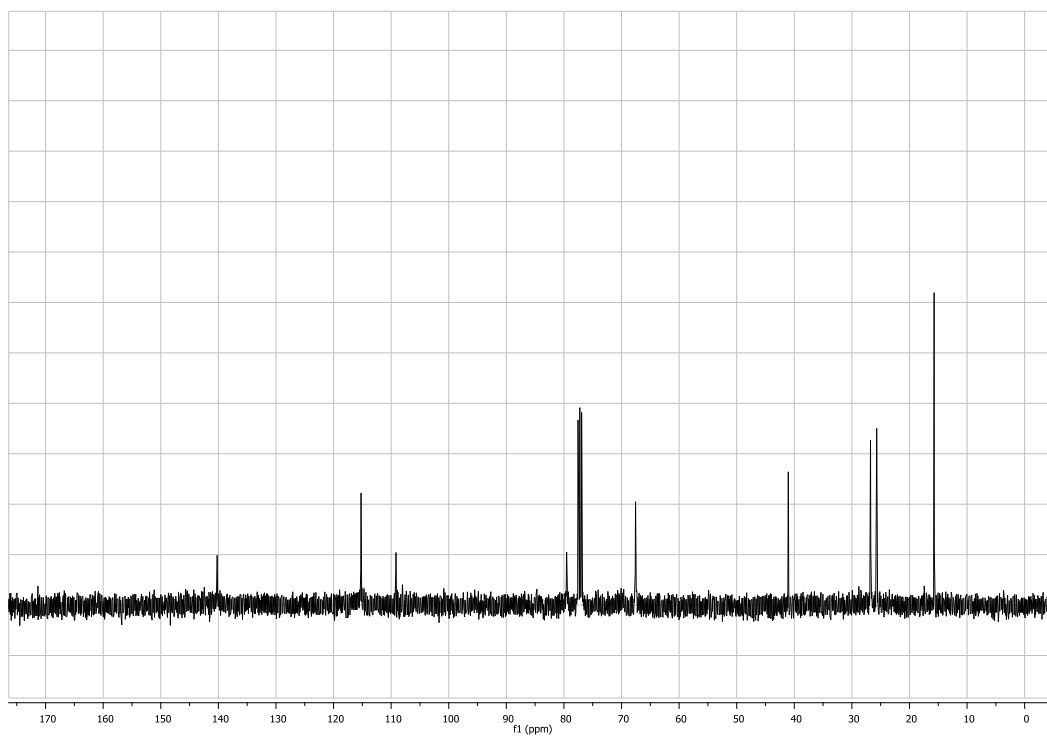

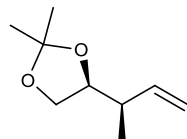

*syn-5a*

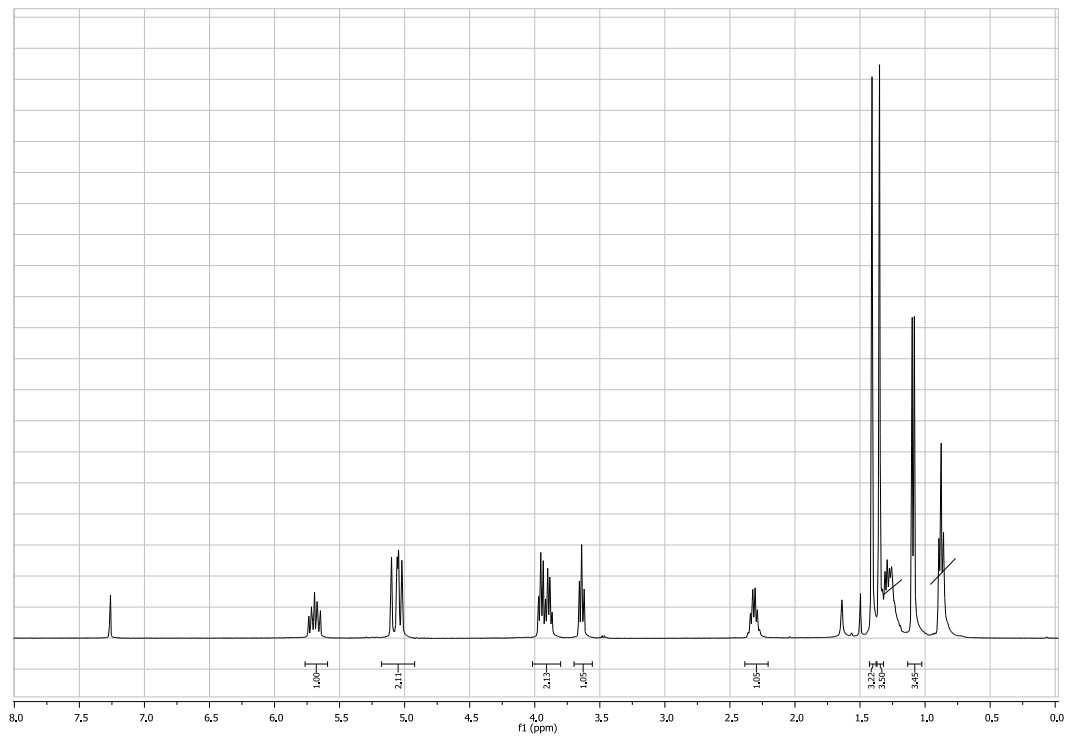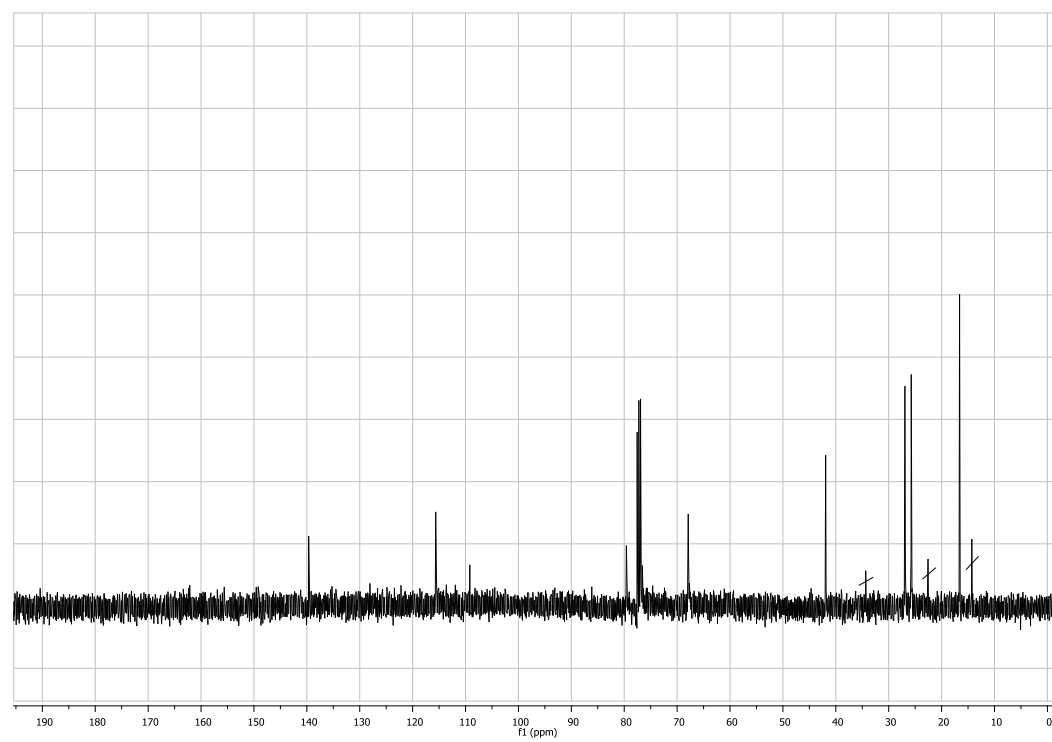

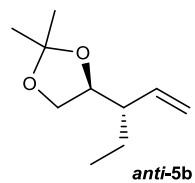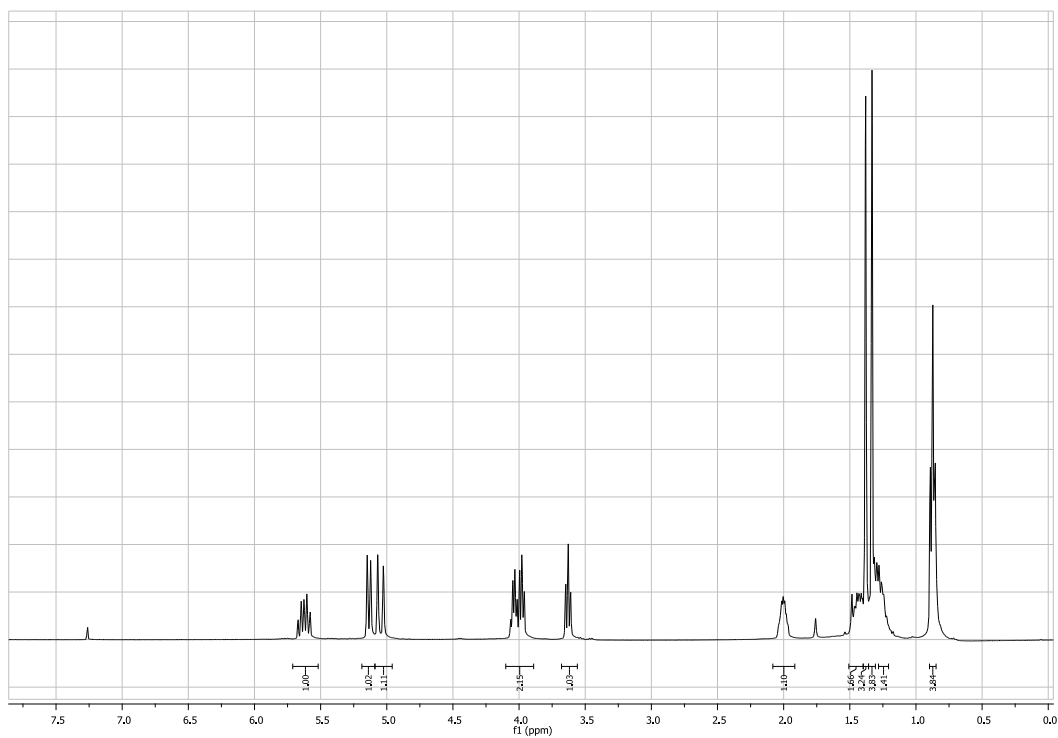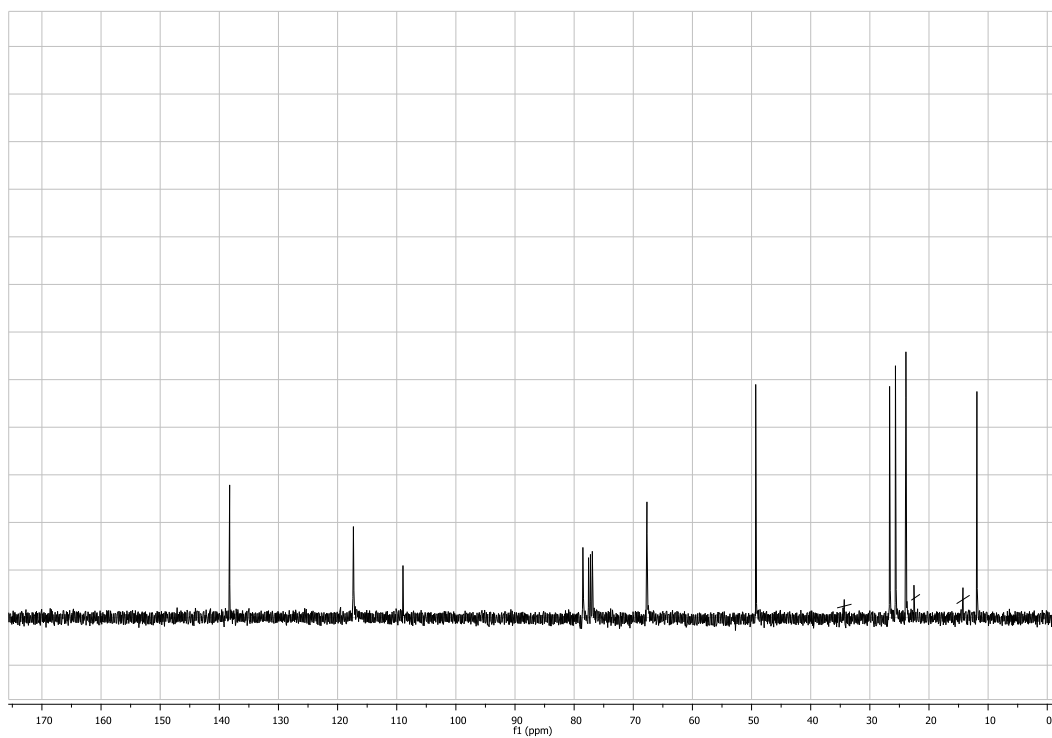

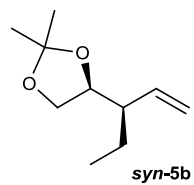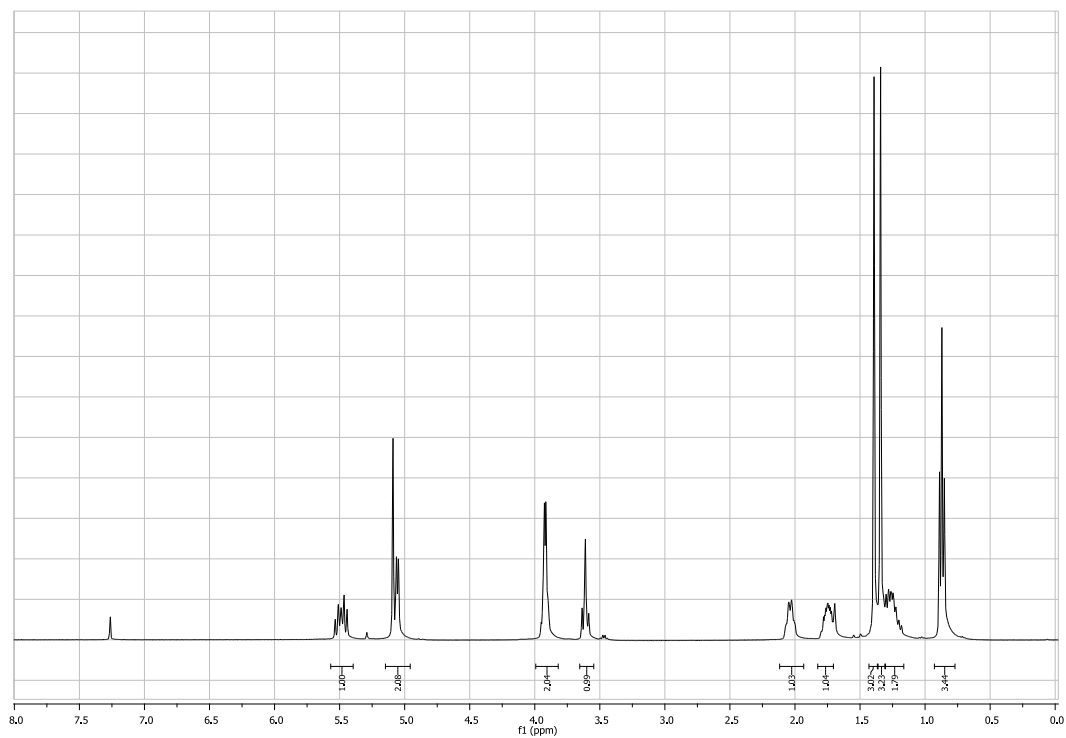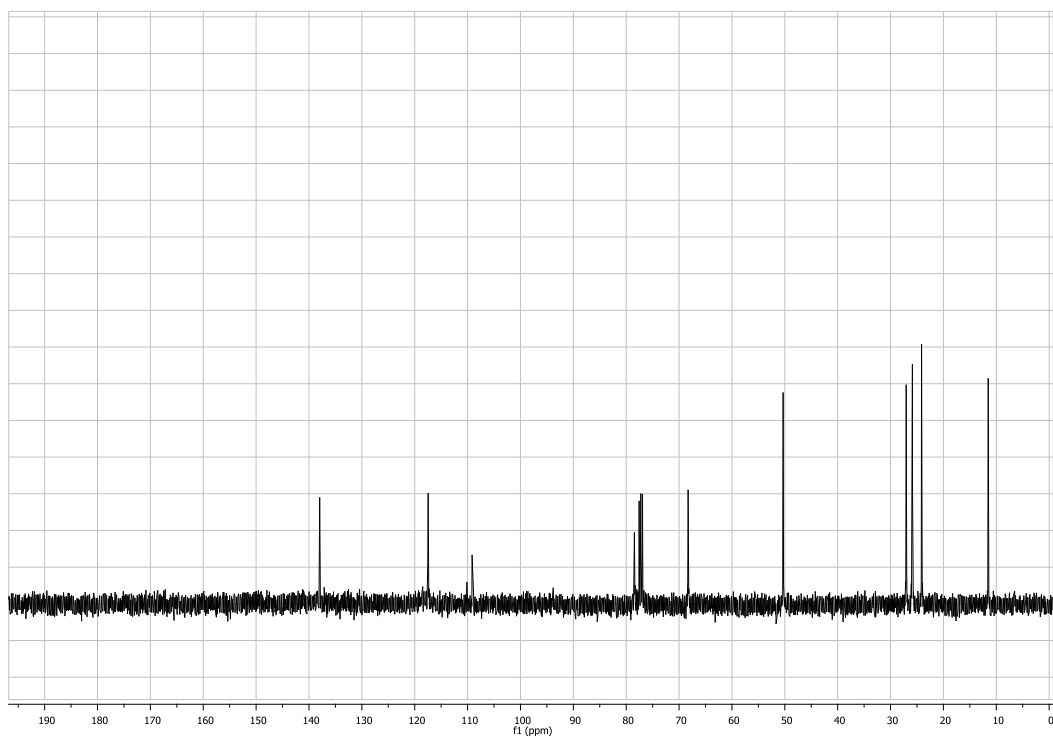

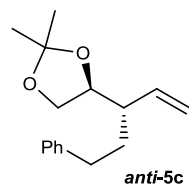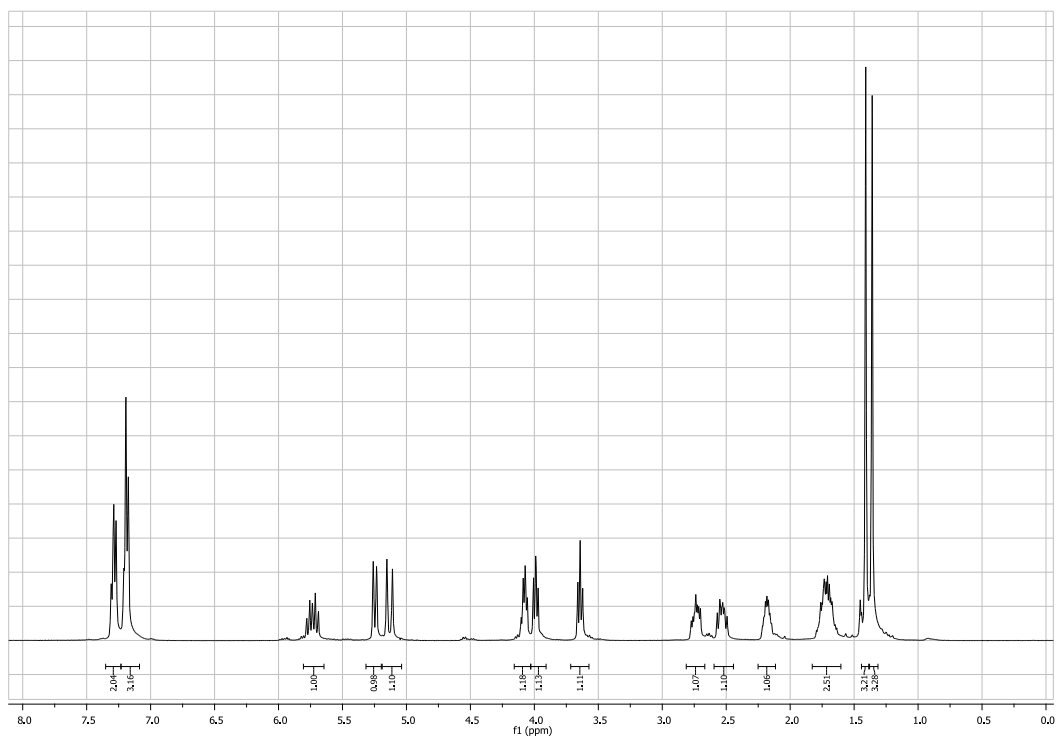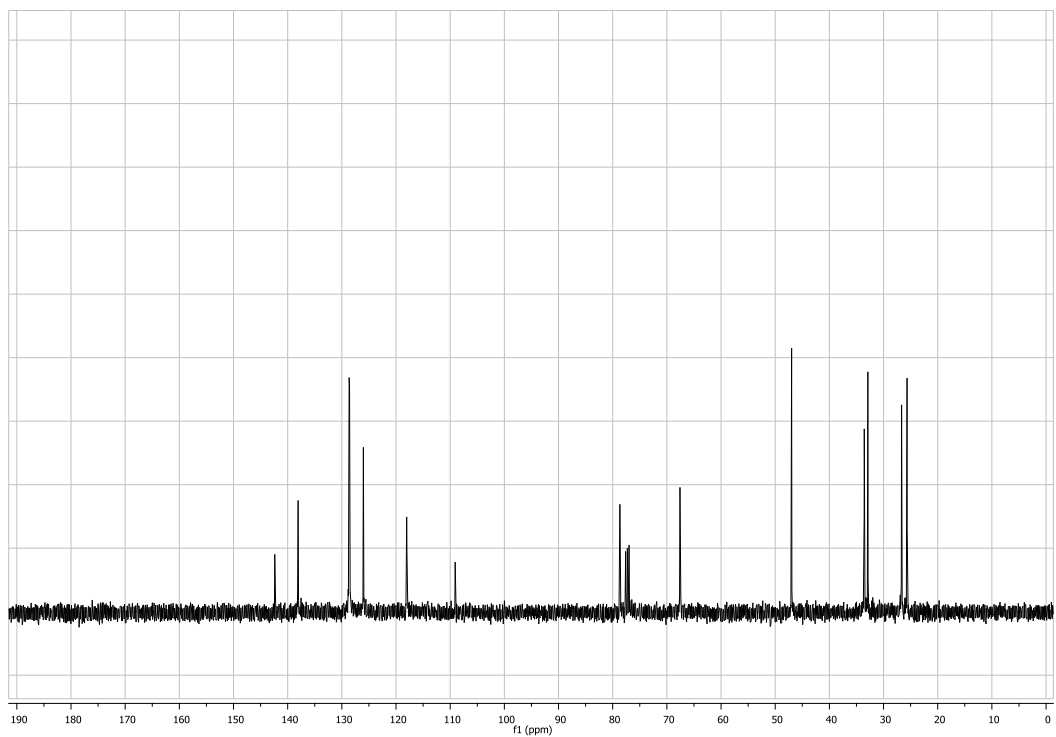



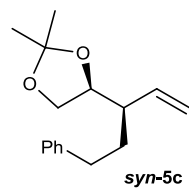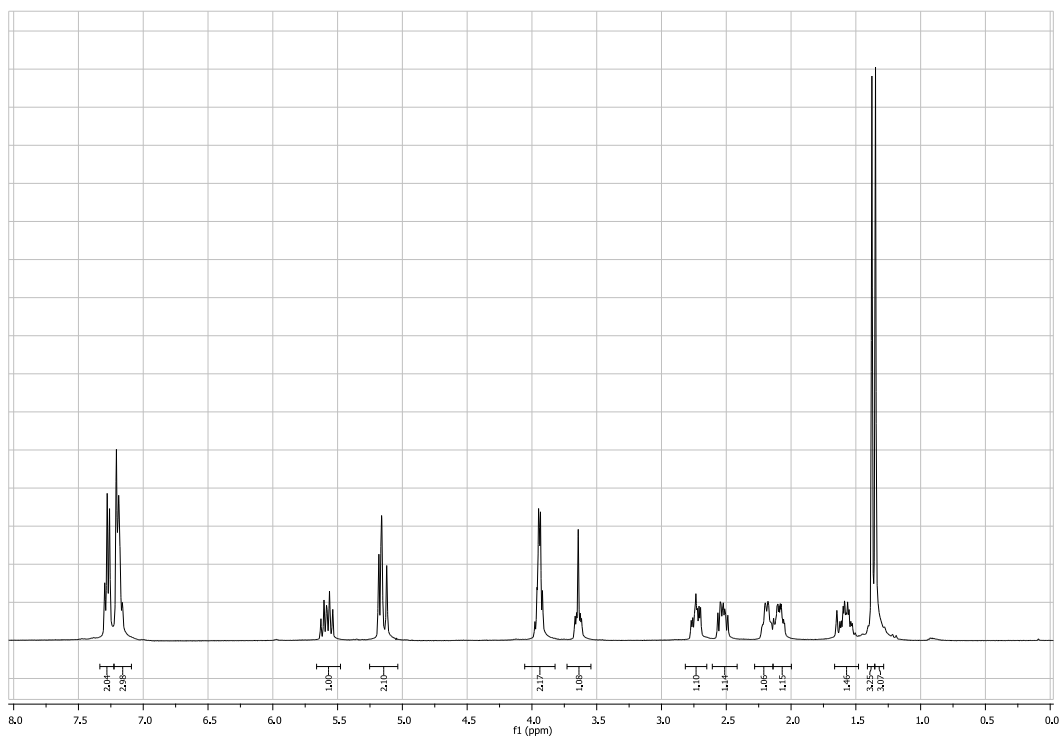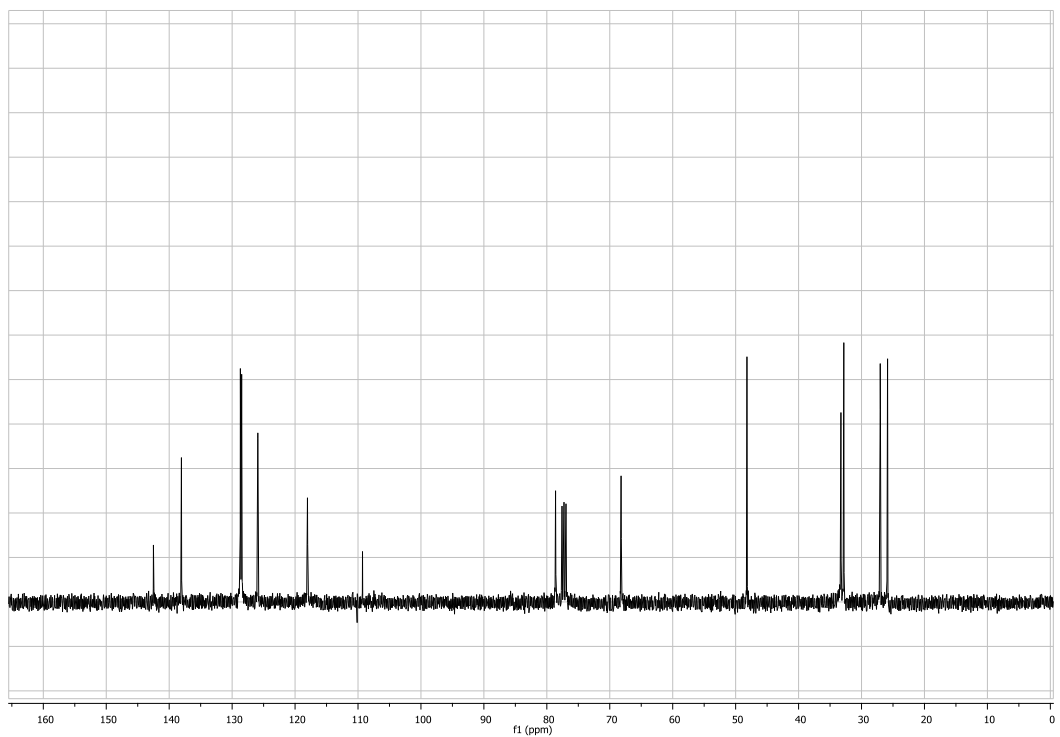

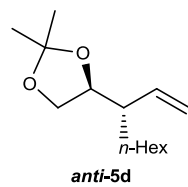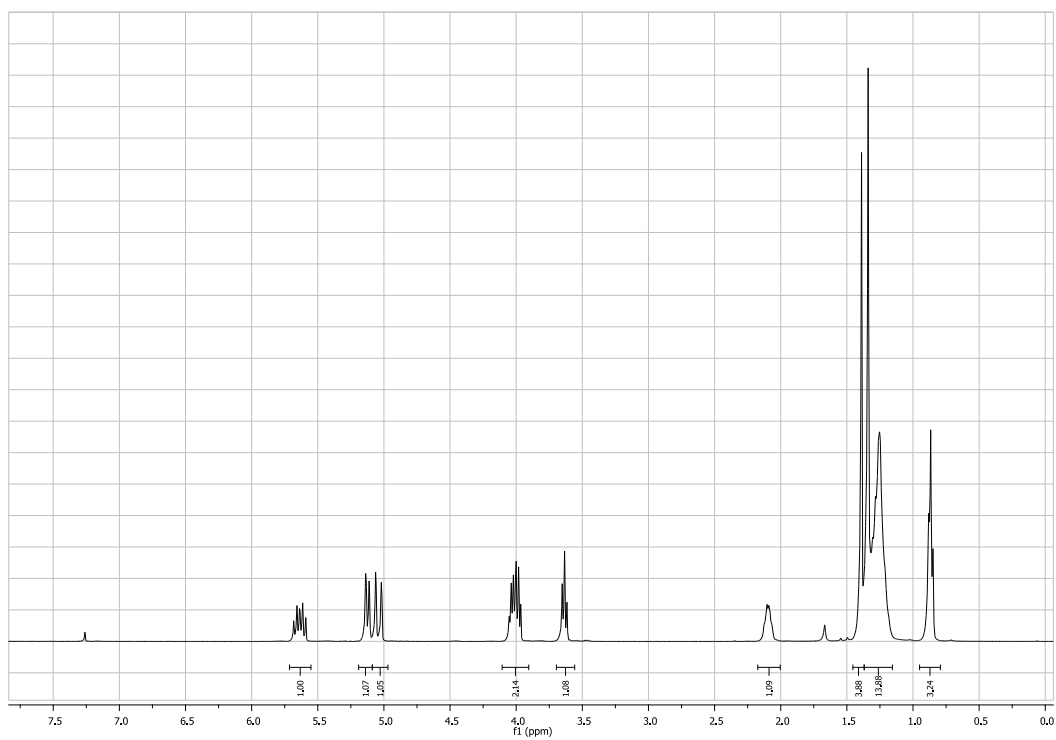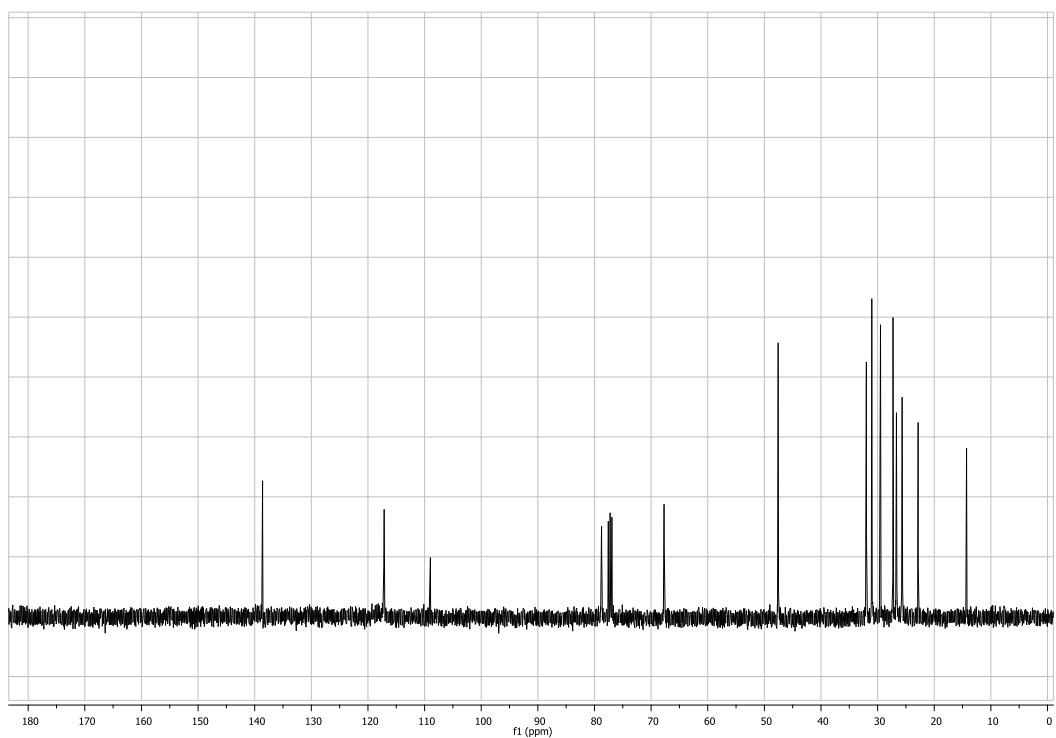

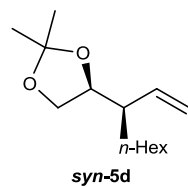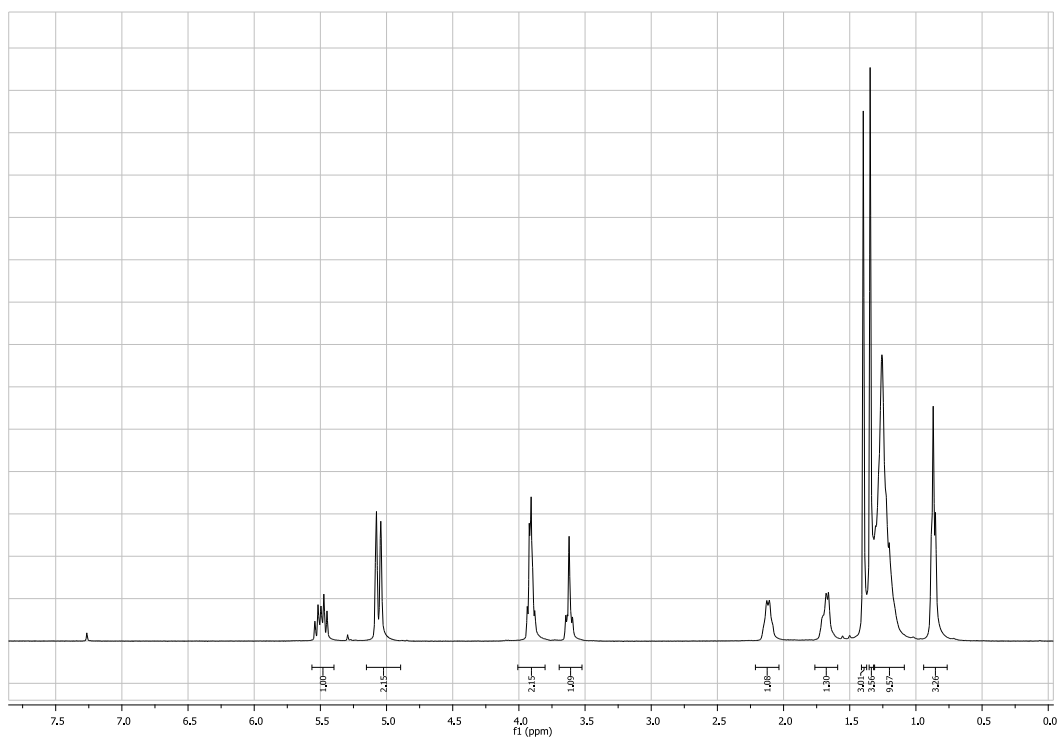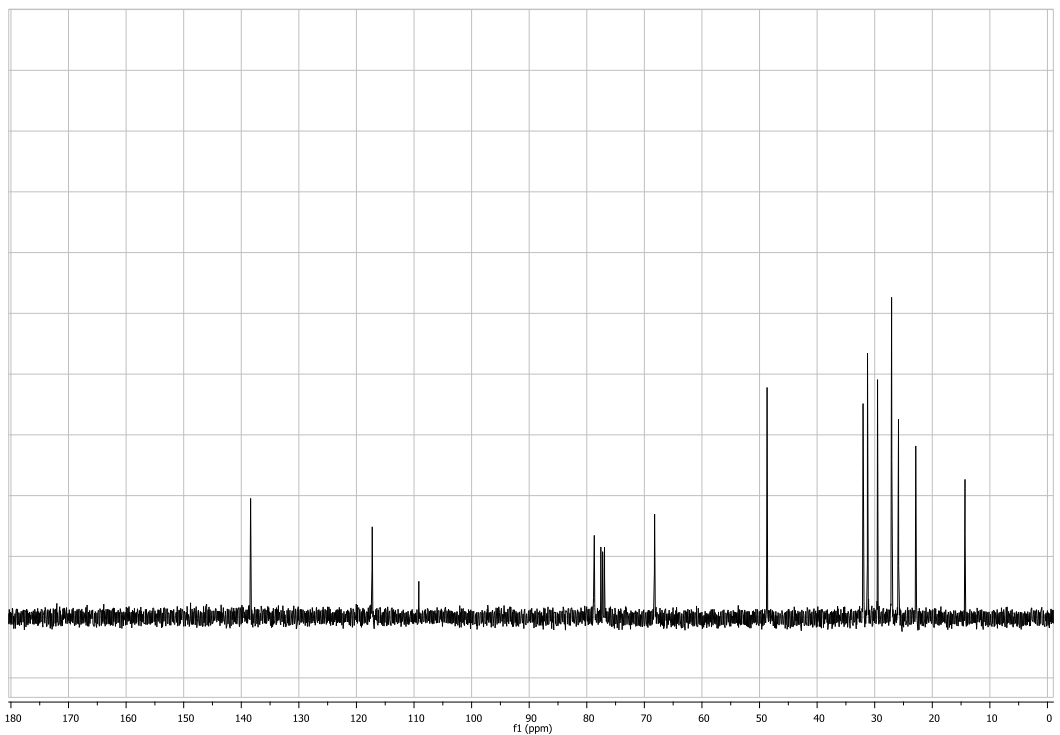

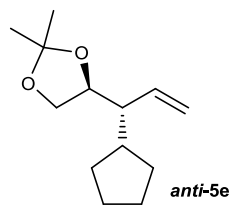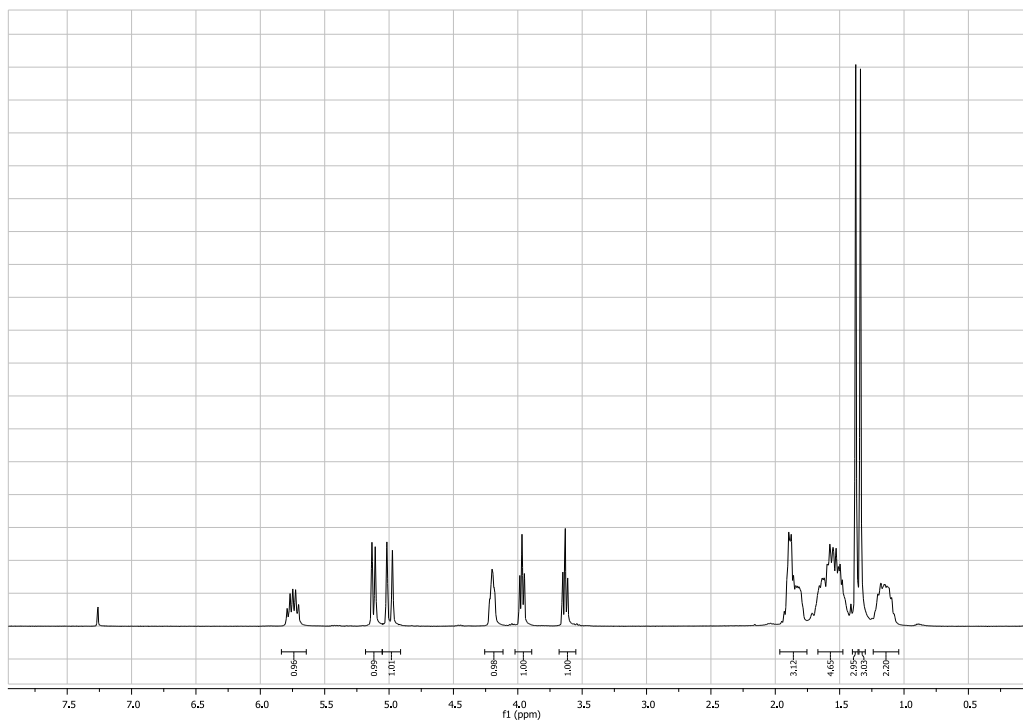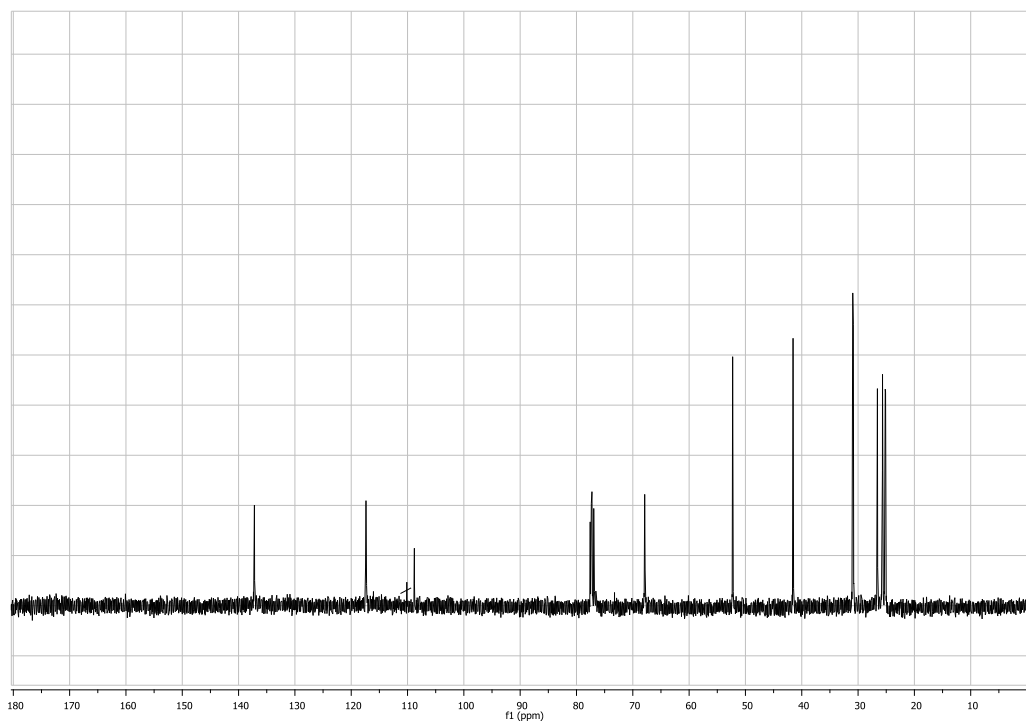

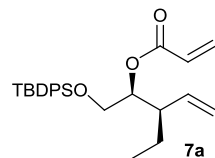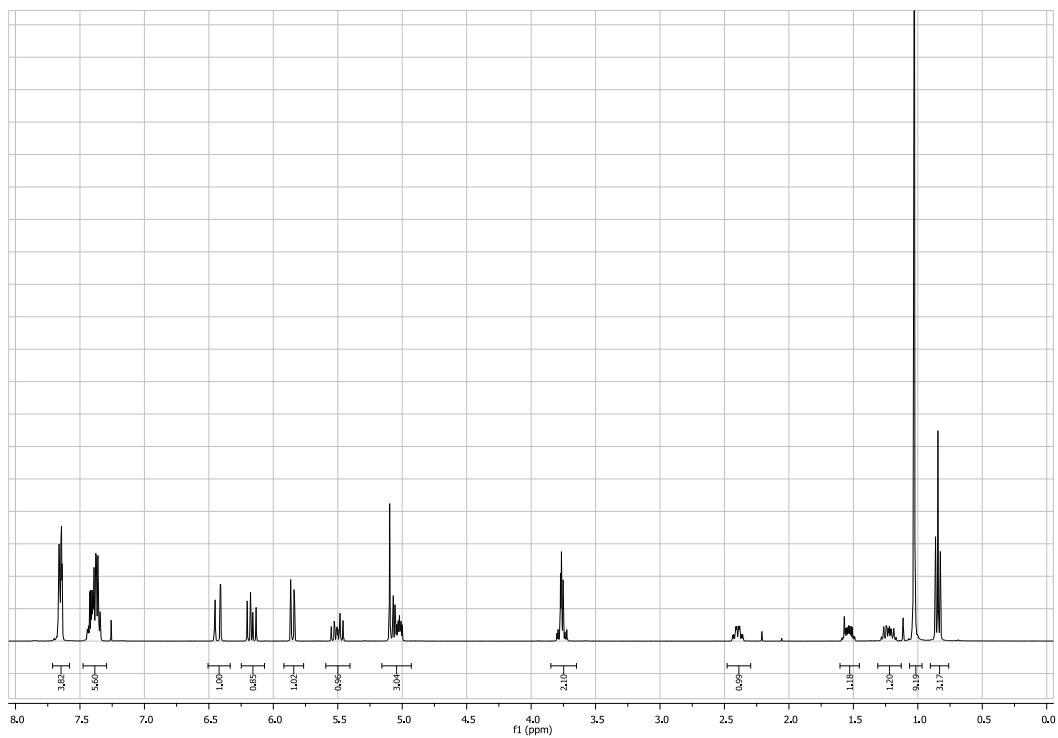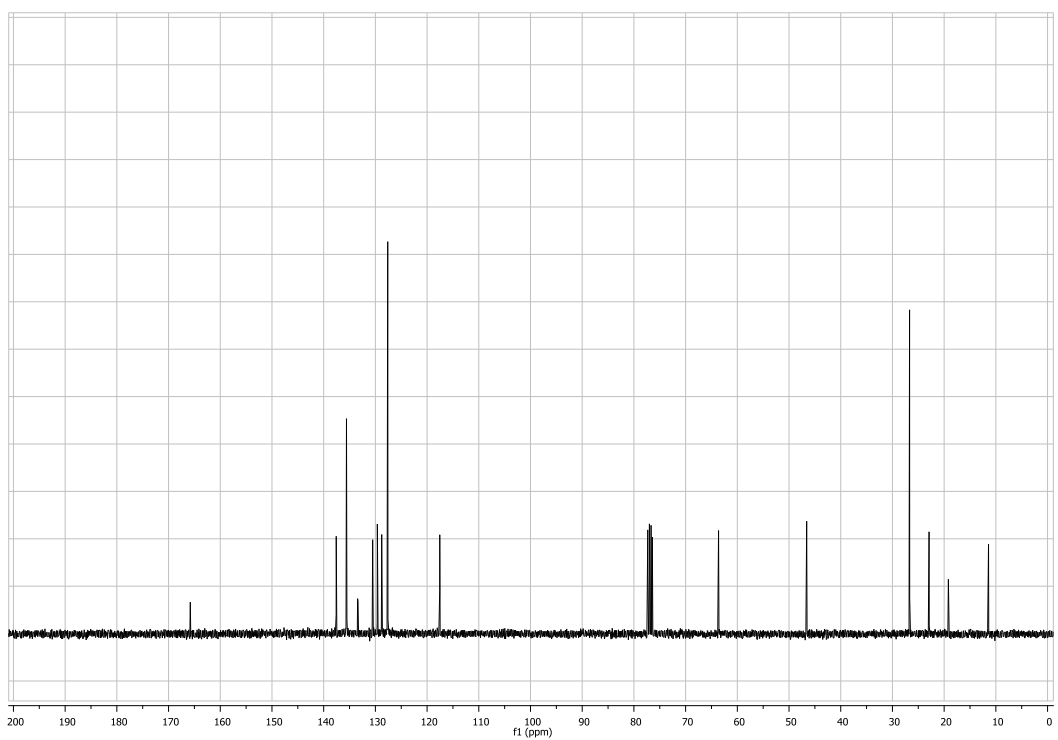

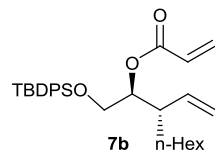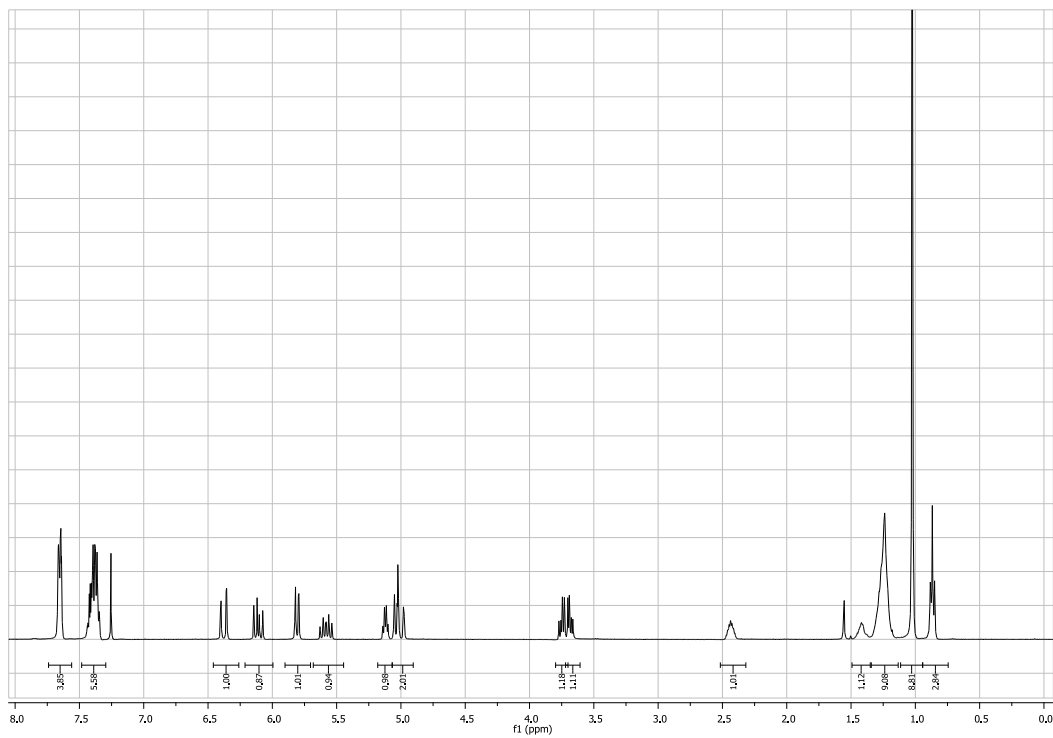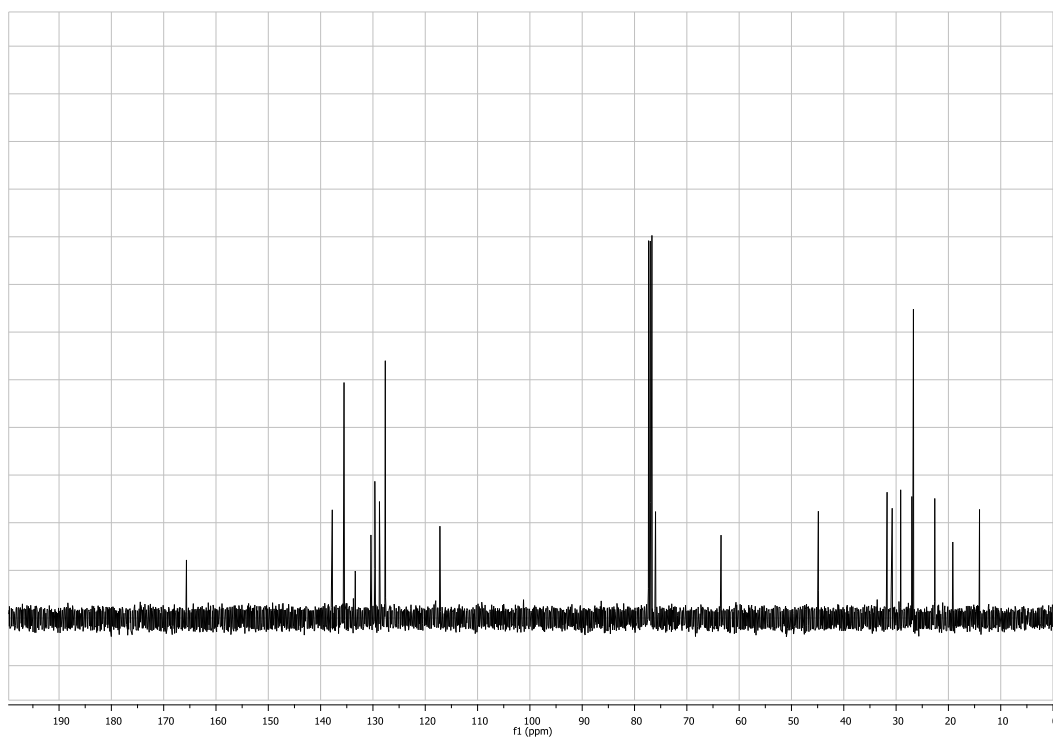

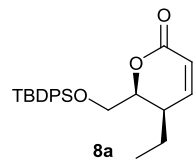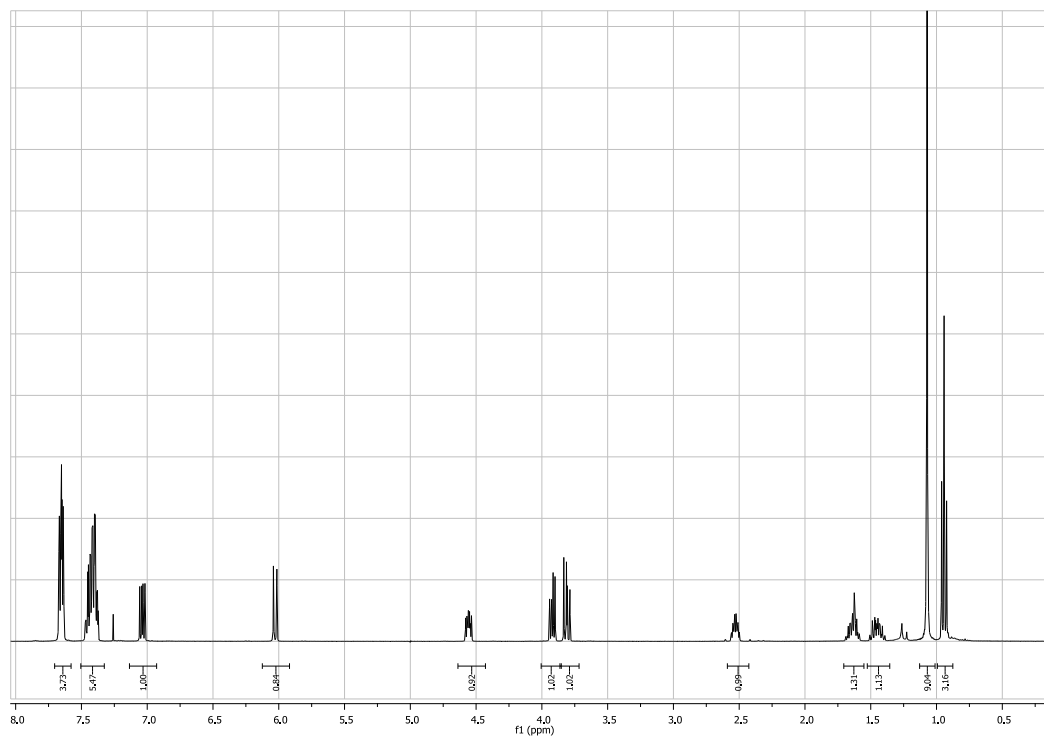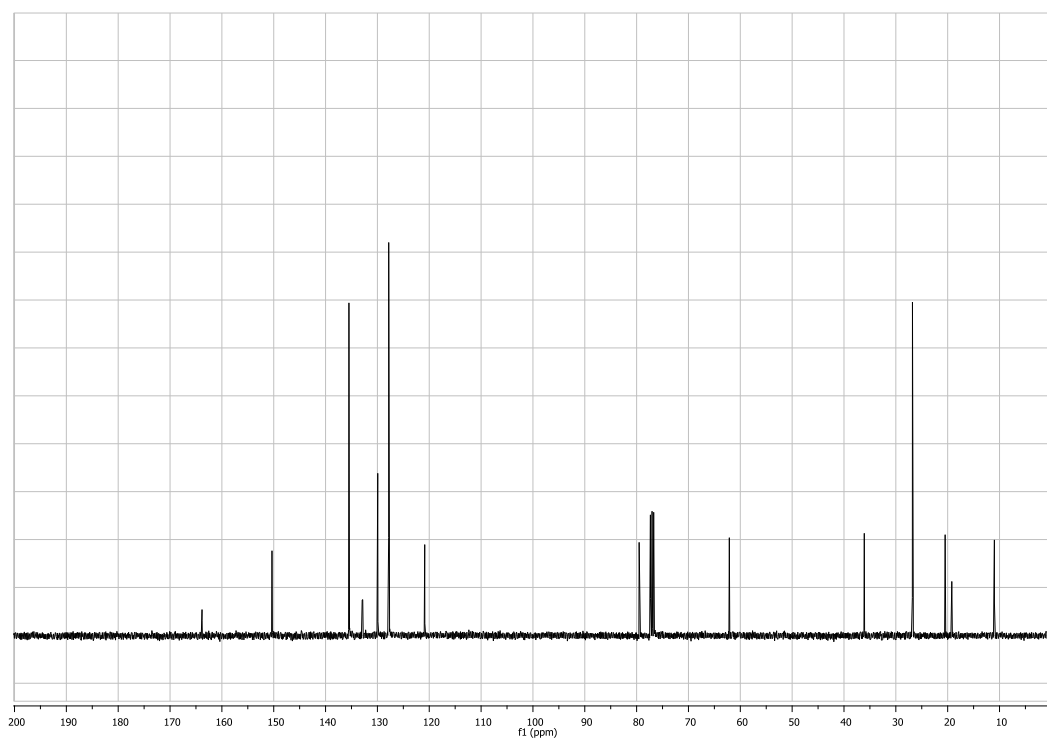

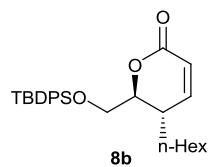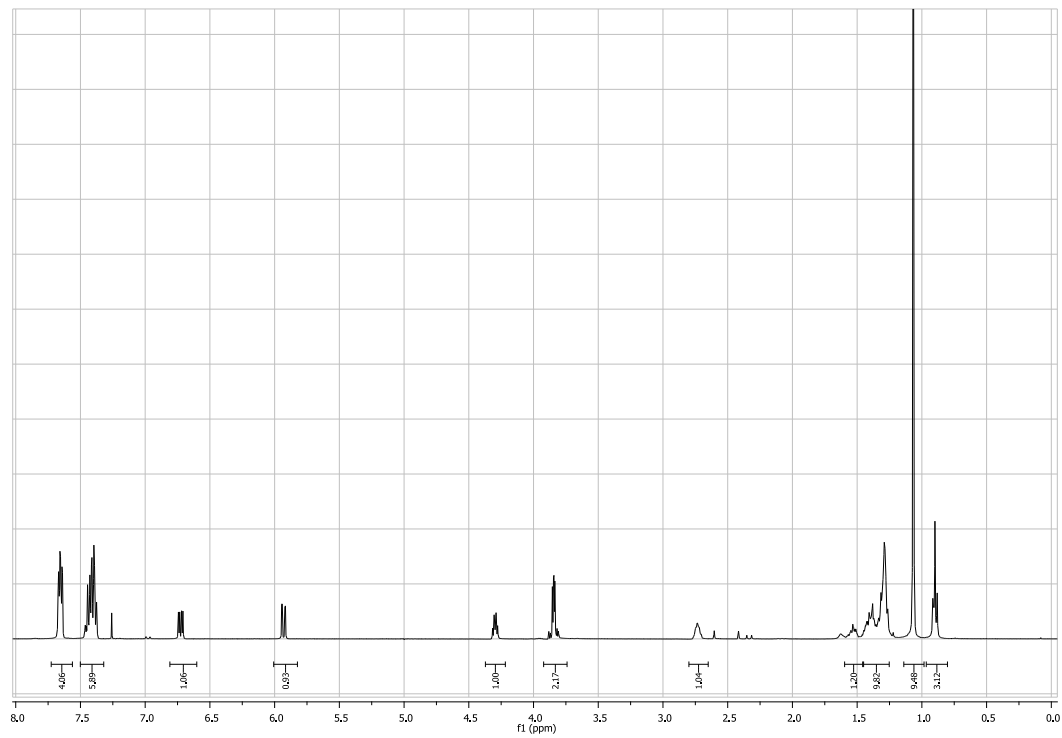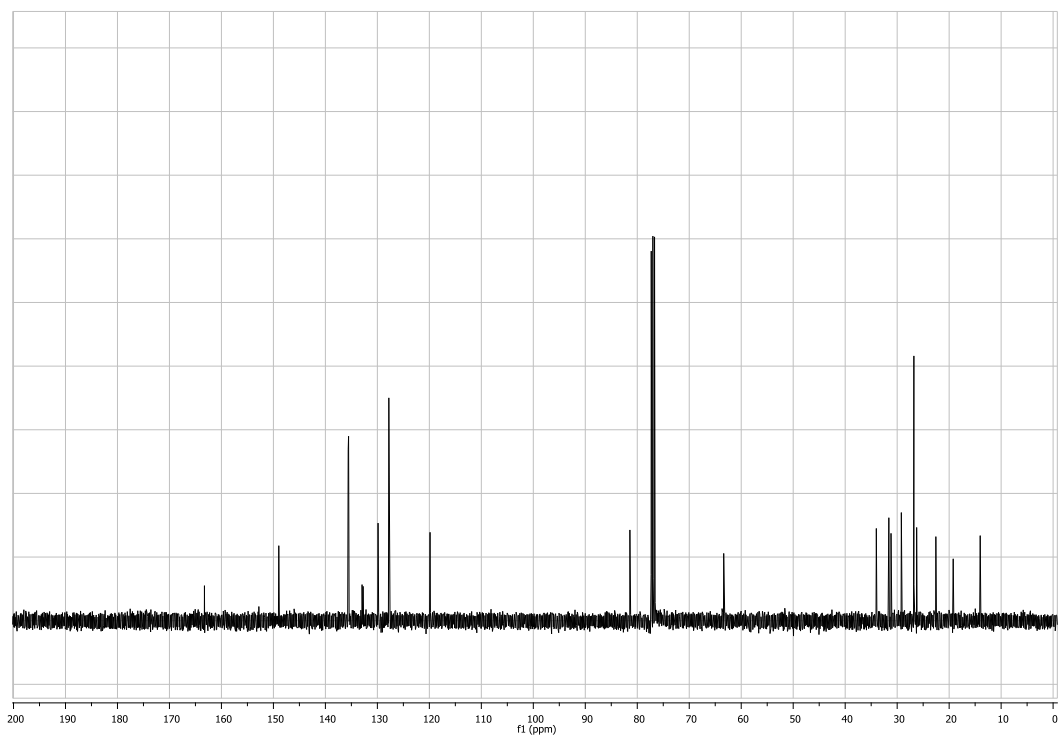



## Proposed mechanism for the copper-catalyzed AAA of allyl bromide **4** with Grignard reagents

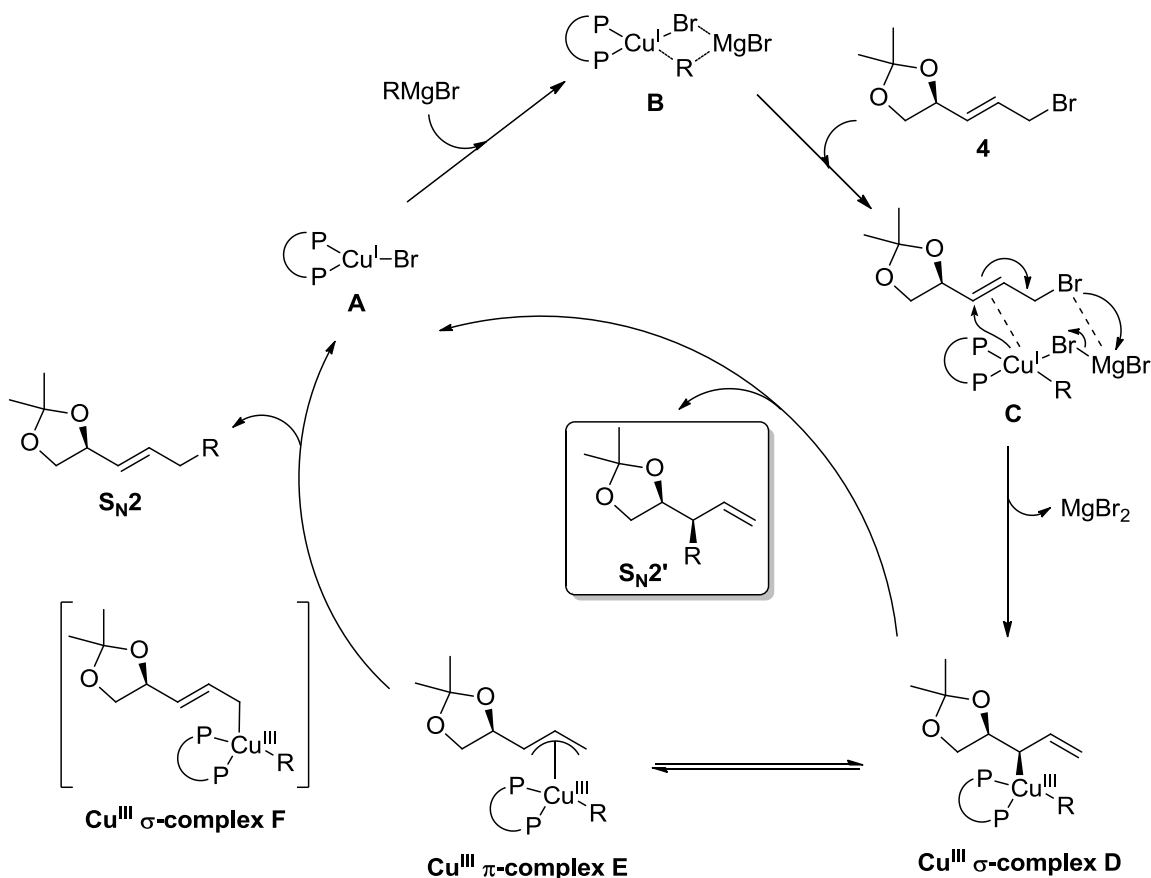

In analogy with the proposed mechanism by Goering and co-workers,<sup>3</sup> the catalytic cycle depicted above can be proposed for the Cu-taniaphos catalyzed AAA of allyl bromide **4**. In this mechanism the precatalyst **A** and the Grignard reagent form the active catalyst **B**.<sup>4</sup> Subsequently, the interaction with allyl bromide **4** forms the Cu<sup>I</sup> π-complex **C**. Oxidative addition and allylic rearrangement from **C** gives the Cu<sup>III</sup> σ-complex **D** which leads to the  $S_N2'$  product via reductive elimination.

The formation of the competing  $S_N2$  product can be explained through an isomerization of the Cu<sup>III</sup> σ-complex **D** into the Cu<sup>III</sup> π-complex **E**. It has been shown that this conversion of the Cu<sup>III</sup> σ-complex into the Cu<sup>III</sup> π-complex is faster at higher

<sup>3</sup> C. C. Tseng, S. D. Paisley, H. L. Goering, *J. Org. Chem.* 1986, **51**, 2884.

<sup>4</sup> S. Harutyunyan, F. López, W. R. Brown, A. Correa, D. Peña, R. Badorrey, A. Meetsma, A. J. Minnaard, B. L. Feringa, *J. Am. Chem. Soc.* 2006, **128**, 9103.

temperatures.<sup>5</sup> Intermediate **E** would evolve to the S<sub>N</sub>2 product via reductive elimination (initially Goering and co-workers<sup>ref1</sup> proposed the formation of a **F** type Cu<sup>III</sup> σ-complex before the reductive elimination can take place). Recent calculations by Nakamura and co-workers have shown that reductive elimination will proceed directly from the π-complex.<sup>6</sup>

**GC traces for the temperature-depending experiments for the AAA of allyl bromide **4** with MeMgBr catalyzed by Cu-TaniaPhos (Table 1).**

Product ratio was determined by GC analysis of the reaction crude, (GC, HP6890: MS HP5973) with an HP5 column, initial temp. 50°C then 10 °C/min to 270 °C (hold for 3 min, final temp).

Retention times (min): 4.2 (*syn*-**5a**), 4.4 (*anti*-**5a**); and 5.3 (**6**).

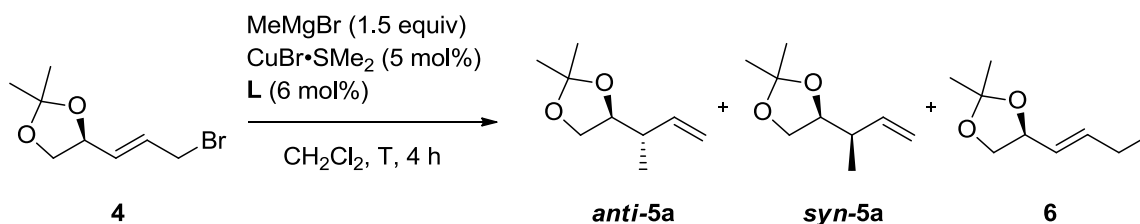

<sup>5</sup> E. R. Bartholomew, S. H. Bertz, S. Cope, M. Murphy, C. A. Ogle, *J. Am. Chem. Soc.* 2008, **130**, 11244.

<sup>6</sup> M. Yamanaka, S. Kato, E. Nakamura, *J. A. Chem. Soc.* 2004, **126**, 6287.

**- L = (R,R)-(+)-taniaphos, T = -75 °C (Table 1, entry 1):**

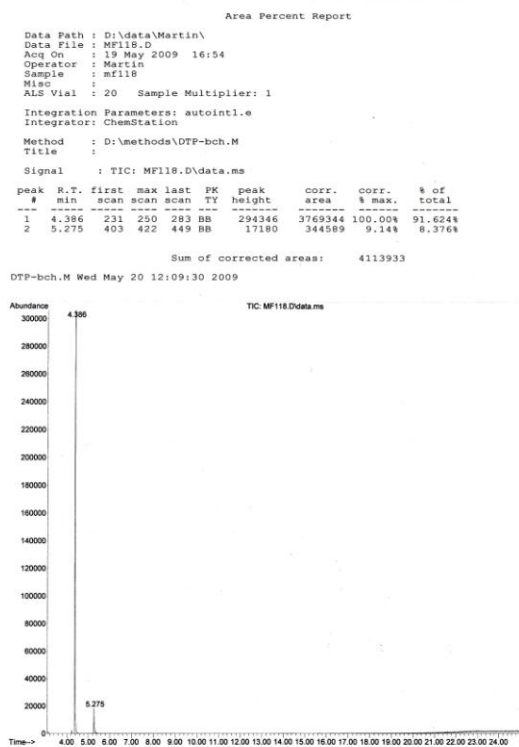

**- L = (R,R)-(+)-taniaphos, T = -80 °C (Table 1, entry 11):**

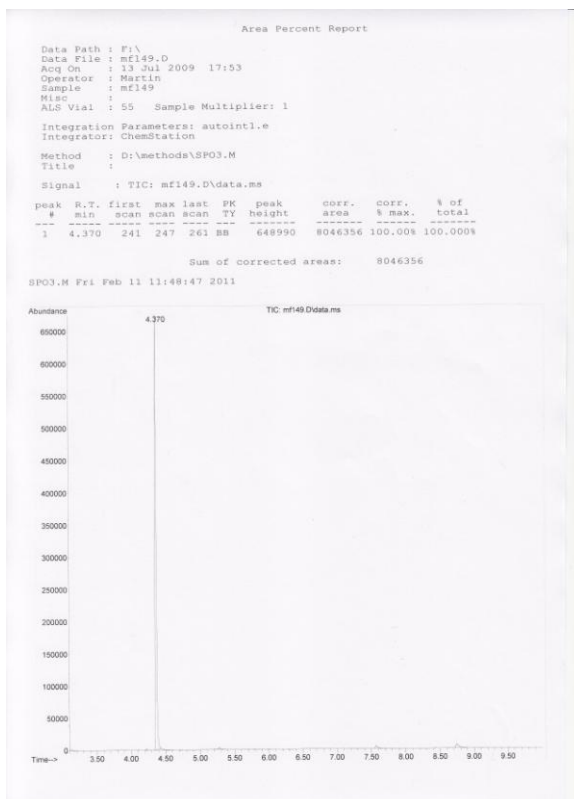

- L = (S,S)-(-)-taniaphos, T = -75 °C (Table 1, entry 2):

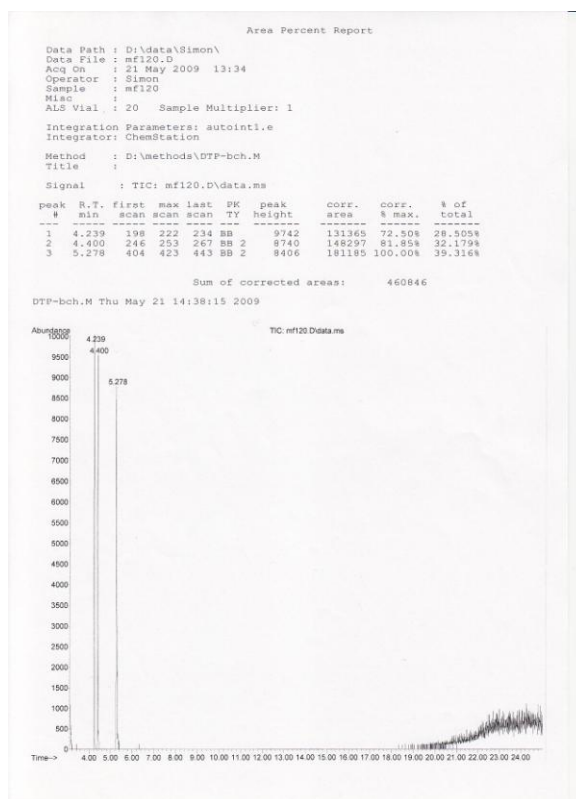

- L = (S,S)-(-)-taniaphos, T = -80 °C (Table 1, entry 12):

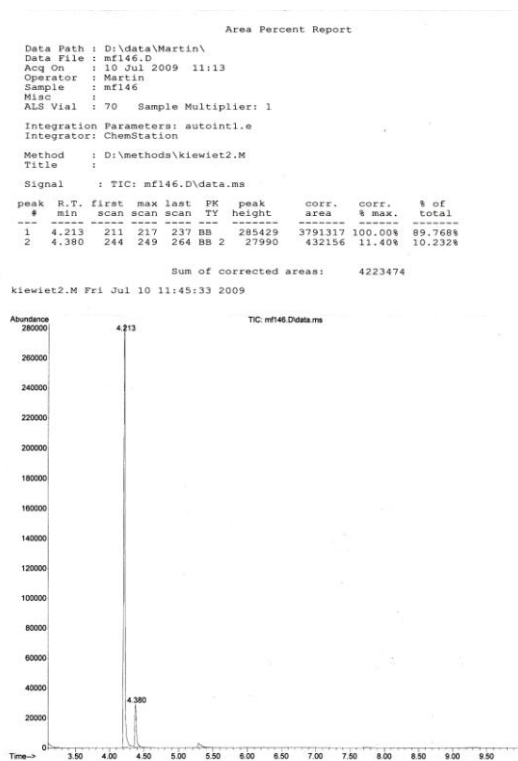

- L = (S,S)-(-)-taniaphos, T = -50 °C:

Area Percent Report

Data Path : D:\data\Martin\  
Data File : mf122.D  
Acq On : 4 Jun 2009 14:28  
Operator : Martin  
Sample : mf122 (HF (2))  
Misc :  
ALS Vial : 19 Sample Multiplier: 1

Integration Parameters: autoint1.e  
Integrator: ChemStation

Method : D:\methods\kiewiet2.M  
Title :  
Signal : TIC: mf122.D\data.ms

| peak # | R.T. min | first scan | max scan | last scan | PK TY | peak height | corr. area | corr. % max. | % of total |
|--------|----------|------------|----------|-----------|-------|-------------|------------|--------------|------------|
| 1      | 4.225    | 208        | 219      | 226       | BB    | 15608       | 182063     | 2.80%        | 2.177%     |
| 2      | 4.378    | 236        | 248      | 262       | BV    | 129121      | 1680791    | 25.86%       | 20.102%    |
| 3      | 5.253    | 406        | 417      | 448       | BV    | 496362      | 6498433    | 100.00%      | 77.720%    |

Sum of corrected areas: 8361288

kiewiet2.M Thu Jun 11 20:07:05 2009

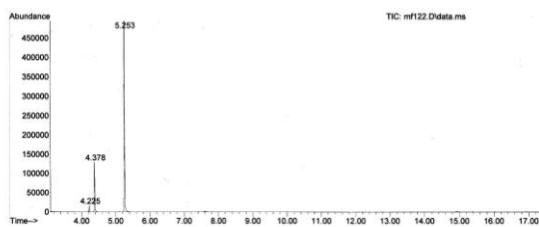

Supplement: c0cc05161f.pdf [file c0cc05161f.pdf]
